# Supplementary material for: Student Satisfaction-Oriented Physical Education Teacher Education Curriculum: A Framework for Evaluating Implementation Effectiveness and Optimizing Quality
Source: Research Square preprint supplement (doi:10.21203/rs.3.rs-6846684/v1), 2026-02-16
Supplement: Supplementary file 1 [file 1d51435361f1a54a396de706.xlsx]

## Sheet: Sheet1
Serial number	Submission deadline	What stage are you currently at? (1 = junior year, 2 = senior year)	2、gender（1=male 2=female）	3、What is your major?	4、Would you be interested in pursuing a career as a physical education teacher?	5、Course Objectives—（1）Clear understanding of course objectives or expectations	5、（2）Course objectives are specific and operational	5、（3）Course objectives align with societal needs	6、Course Structure—（1）Proportion of general teacher education courses is reasonable	6、（2）Proportion of physical education (PE) teacher education	6、（3）Proportion of practical PE courses is reasonable	6、（4）Course arrangements are well-connected across academic years	6、（5）Allocation of compulsory and elective courses is reasonable	6、（6）Theoretical and practical courses are well-integrated	7、Course Content—（1）PETE course content is highly professional and easy to understand	7、（2）PETE Course content is up-to-date and innovative	7、（3） PETE Course content covers cutting-edge topics and hot issues	7、（4）PETE Course content is closely linked to actual teaching needs	7、（5）Course content reflects the characteristics of PE and meets professional needs	7、（6）Physical education teaching practice courses in various forms	7、（7）Physical education teaching practice course content is comprehensive and specific	8、Evaluation & Assessment—（1）Teachers adopt a variety of ways	8、（2）The usual efforts are directly proportional to the assessment results	9、knowledge acquisition—（1）better understand students 'psychology and respect students' personality differences	9、（2） better understand the students' cognitive development, the characteristics of learning style and the influencing factors	9、 （3）better understand the process of students 'moral character and behavior habit formation, and understand the characteristics of students' communication	9、（4）To have a clear understanding of the physical education teacher profession, clear the meaning of the teacher work	9、（5）Understand the rights and responsibilities of physical education teachers	9、（6）Master the theoretical knowledge of physical education teaching	9、（7）Master the knowledge and skills of moral education	9、（8）:Understand the stage of the professional development of physical education teachers	9、（9）More willing to engage in education career	10、Competence Development—（1）Through the study of PETE,Mastery of PE teaching theory and practical skills	10、（2）Ability to independently conduct teaching	10、（3）Ability to moral education	10、（4）Ability to explain and demonstrate movements	10、（5）Possesses lifelong learning skills (the ability to independently identify, analyze, and solve problems)	10、（6）PETE Courses are highly beneficial for future career development
1	2024/12/24 7:43:01	2	2	Physical Education	1	3	3	2	3	2	4	4	3	4	2	3	3	4	4	4	2	4	4	2	4	2	4	4	2	4	3	3	3	4	4	3	3	3
2	2024/12/24 7:47:12	2	2	Physical Education	1	4	4	4	4	3	3	4	3	3	4	4	3	4	4	3	4	4	4	4	3	5	4	4	3	4	3	4	4	4	3	4	4	3
3	2024/12/24 7:51:45	1	2	Physical Education	1	4	4	4	4	4	4	4	4	4	4	4	4	4	4	4	4	3	4	4	3	3	4	4	3	4	4	3	3	4	4	4	3	3
4	2024/12/24 7:52:18	2	2	Physical Education	1	4	3	3	3	3	4	4	4	4	3	3	3	4	3	3	3	4	4	4	4	4	4	4	4	4	4	4	4	4	4	4	4	4
5	2024/12/24 8:08:26	1	2	Physical Education	1	5	5	5	5	5	5	5	5	5	2	5	5	5	5	5	5	5	5	5	5	5	5	5	5	5	5	5	5	5	5	5	5	5
6	2024/12/24 8:12:55	1	1	Physical Education	2	4	4	4	4	4	4	4	4	4	4	4	4	4	4	4	4	4	4	4	4	4	4	4	4	4	4	4	4	4	4	4	4	4
7	2024/12/24 8:16:55	1	1	Physical Education	1	5	5	5	5	5	5	5	5	5	1	5	5	5	5	5	5	5	5	5	5	5	5	5	5	5	5	5	5	5	5	5	5	5
8	2024/12/24 9:24:31	1	2	Physical Education	1	4	4	4	4	4	4	3	4	5	4	4	4	4	4	4	4	4	4	4	4	4	4	4	4	4	4	4	4	4	4	4	4	4
9	2024/12/24 9:32:04	2	2	Physical Education	1	4	5	5	4	4	5	4	4	4	3	4	5	4	4	5	5	5	5	5	5	5	5	5	5	5	5	4	5	5	5	5	5	5
10	2024/12/24 9:37:48	2	1	Physical Education	1	4	5	4	5	5	5	4	5	5	4	5	4	5	4	5	5	5	5	5	5	5	5	5	4	5	5	4	5	5	5	5	5	5
11	2024/12/24 9:39:50	2	1	Physical Education	1	4	4	4	5	4	4	3	4	5	5	4	5	5	4	5	4	4	4	5	4	5	4	5	4	5	4	4	3	4	4	5	3	4
12	2024/12/24 9:45:29	2	1	Physical Education	1	5	5	5	5	5	5	5	5	5	5	5	5	5	5	5	5	5	5	5	5	5	5	5	5	4	4	4	5	4	4	4	4	4
13	2024/12/24 9:46:44	2	2	Physical Education	1	5	4	4	5	4	5	4	4	4	4	5	4	4	4	5	5	5	5	5	5	4	5	5	5	5	4	4	5	4	5	4	4	4
14	2024/12/24 9:52:11	2	2	Physical Education	1	5	4	4	4	5	5	5	4	4	4	4	4	5	5	3	3	3	4	4	4	4	4	4	3	4	3	4	4	4	4	4	4	4
15	2024/12/24 9:54:20	2	1	Physical Education	1	4	4	4	4	3	4	4	4	5	5	4	4	4	4	4	4	4	5	5	4	4	5	4	4	4	4	5	4	4	5	4	5	4
16	2024/12/24 9:54:35	2	1	Physical Education	1	5	3	5	5	5	4	5	5	5	5	5	5	5	5	5	5	5	4	4	5	5	5	5	4	5	5	5	4	5	5	4	5	5
17	2024/12/24 9:56:08	1	1	Physical Education	1	4	4	4	4	4	4	4	4	4	3	4	3	3	3	3	3	4	4	4	4	4	4	3	3	3	4	4	4	3	4	3	4	4
18	2024/12/24 10:01:21	2	1	Physical Education	1	3	3	3	3	3	3	3	3	3	4	3	3	3	3	3	3	3	3	3	3	3	3	3	3	3	3	3	3	3	3	3	3	3
19	2024/12/24 10:02:21	1	1	Physical Education	1	4	4	4	5	5	5	5	5	4	5	5	5	5	5	5	4	4	5	5	5	5	5	5	5	5	5	5	5	5	5	5	5	5
20	2024/12/24 10:03:50	2	2	Physical Education	1	4	4	4	4	4	4	4	4	4	4	4	4	4	4	4	4	3	3	4	4	4	4	4	4	3	4	3	3	3	3	4	4	4
21	2024/12/24 10:06:24	2	2	Community Sports Guidance and Management	1	1	1	1	1	1	1	1	1	1	1	1	1	1	1	1	1	1	1	1	1	1	1	1	1	1	1	1	1	1	1	1	1	1
22	2024/12/24 10:08:37	2	2	Sports Training	1	4	4	4	4	4	4	4	4	4	2	3	4	4	4	4	4	4	4	4	4	4	4	4	4	4	4	4	4	4	4	4	4	4
23	2024/12/24 10:10:44	1	2	Physical Education	1	4	4	4	4	4	4	4	4	4	2	4	4	4	4	4	4	5	5	5	5	5	5	5	5	5	5	5	5	5	5	5	5	5
24	2024/12/24 10:25:21	2	2	Physical Education	1	5	5	5	5	5	5	5	5	5	5	5	5	5	5	5	5	5	5	5	5	5	5	5	5	5	5	5	4	4	4	4	4	4
25	2024/12/24 10:44:36	2	1	Physical Education	1	2	2	2	1	2	1	2	2	2	2	1	1	1	1	2	2	1	2	2	1	2	2	2	1	2	2	1	2	2	2	3	3	2
26	2024/12/24 10:46:26	2	1	Community Sports Guidance and Management	1	4	4	4	4	4	4	3	4	4	3	4	4	4	4	4	4	5	4	4	4	4	4	4	4	4	4	4	3	3	3	4	4	4
27	2024/12/24 10:49:18	2	2	Physical Education	1	4	4	4	3	4	3	4	3	5	3	4	3	4	4	4	4	2	2	2	4	2	4	4	4	2	2	2	2	3	2	4	2	4
28	2024/12/24 10:50:34	1	2	Physical Education	1	5	5	5	5	5	5	5	5	5	5	5	5	5	5	5	5	5	5	5	5	5	5	5	5	5	5	5	5	5	5	5	5	5
29	2024/12/24 10:52:08	2	1	Physical Education	1	5	5	5	5	5	5	5	5	5	5	5	5	5	5	5	5	5	5	5	5	5	5	5	5	5	5	5	5	5	5	5	5	5
30	2024/12/24 10:54:47	2	2	Physical Education	1	4	4	4	4	3	3	3	4	4	3	4	4	4	4	4	4	4	4	5	5	5	5	5	5	5	5	5	4	4	4	4	4	4
31	2024/12/24 11:02:11	2	1	Physical Education	1	1	1	1	1	1	1	1	1	1	1	1	1	1	1	1	1	1	1	1	1	1	1	1	1	1	1	1	1	1	1	1	1	1
32	2024/12/24 11:06:51	1	1	Sports Training	2	5	5	5	5	5	5	5	5	5	5	5	5	5	5	5	5	5	5	5	5	5	5	5	5	5	5	5	5	5	5	5	5	5
33	2024/12/24 11:28:45	2	1	Physical Education	1	4	4	4	4	4	4	4	4	4	4	3	3	4	4	4	4	5	4	4	5	5	5	4	4	4	5	5	4	4	4	5	4	5
34	2024/12/24 11:33:54	2	1	Physical Education	1	5	5	5	5	5	5	5	5	5	5	5	5	5	5	5	5	5	5	5	5	5	5	5	5	5	5	5	5	5	5	5	5	5
35	2024/12/24 11:41:54	2	1	Sports	1	4	4	4	4	4	4	4	4	4	3	3	3	3	3	4	4	4	4	4	4	4	4	4	4	4	4	4	4	4	4	4	4	4
36	2024/12/24 11:43:38	2	2	Physical Education	1	3	3	3	3	3	3	3	3	3	3	3	3	3	3	3	3	3	3	3	3	3	3	3	3	3	3	3	3	3	3	3	3	3
37	2024/12/24 11:44:34	2	1	Physical Education	1	5	5	5	5	5	5	5	5	5	5	4	5	5	5	5	5	5	5	5	5	5	5	5	5	5	5	5	5	5	5	5	5	5
38	2024/12/24 11:47:38	2	1	Physical Education	1	4	4	4	4	4	4	4	4	4	4	4	4	4	4	4	4	4	2	3	3	3	4	3	3	3	3	3	4	4	4	4	4	4
39	2024/12/24 11:48:09	2	1	Community Sports Guidance and Management	1	5	5	5	5	5	5	5	5	5	5	5	5	5	5	5	5	5	5	5	5	5	5	5	5	5	5	5	5	5	5	5	5	5
40	2024/12/24 11:50:09	2	1	Physical Education	1	5	5	5	5	5	4	5	4	5	2	5	4	5	5	5	5	4	4	4	4	4	4	4	4	5	5	5	5	4	5	4	3	5
41	2024/12/24 11:51:46	2	2	Physical Education	2	3	3	4	4	4	4	4	3	4	4	3	4	4	4	4	4	4	3	4	4	5	4	4	4	5	3	3	4	3	4	4	4	2
42	2024/12/24 11:52:37	2	1	Physical Education	1	4	3	4	4	4	3	3	4	5	5	5	4	5	4	4	4	4	3	4	4	4	4	4	3	4	4	4	5	4	4	3	4	3
43	2024/12/24 11:55:06	2	1	Physical Education	1	4	4	4	4	4	4	4	4	4	3	3	3	3	3	3	3	4	4	4	4	4	4	4	4	4	4	4	4	4	4	4	4	4
44	2024/12/24 11:56:21	2	2	Physical Education	1	5	5	5	5	5	5	5	5	5	5	5	5	5	5	5	5	5	5	5	5	5	5	5	5	5	5	5	5	5	5	5	5	5
45	2024/12/24 11:59:55	2	1	Physical Education	1	5	5	5	5	5	5	5	5	5	5	5	5	5	5	5	5	5	5	5	5	5	5	5	5	5	5	5	5	5	5	5	5	5
46	2024/12/24 12:00:20	2	1	Physical Education	1	5	5	5	5	4	5	5	4	4	4	4	5	4	3	4	4	4	4	4	5	4	4	5	4	4	4	4	4	5	4	4	4	4
47	2024/12/24 12:07:32	2	2	Physical Education	1	5	5	5	5	5	5	5	5	5	5	5	5	5	5	5	5	5	5	5	5	5	5	5	5	5	5	5	5	5	5	5	5	5
48	2024/12/24 12:11:00	2	1	Physical Education	1	4	4	4	4	4	4	4	4	4	2	4	4	4	4	4	4	4	4	4	4	4	4	4	4	4	4	4	4	3	3	4	4	4
49	2024/12/24 12:19:41	2	1	Physical Education	1	5	5	5	4	4	4	4	5	5	3	5	5	5	5	5	5	5	5	5	5	5	5	5	5	5	5	5	5	5	5	5	5	5
50	2024/12/24 12:32:19	1	2	Physical Education	1	4	5	5	5	5	5	5	5	5	2	4	4	4	4	4	4	4	4	4	4	4	4	4	4	4	4	4	4	4	4	4	4	4
51	2024/12/24 12:35:23	2	1	Physical Education	1	4	4	4	3	3	4	3	4	4	2	3	2	3	4	4	4	4	4	4	4	4	4	4	4	4	3	3	3	3	4	4	4	4
52	2024/12/24 12:35:26	2	2	Physical Education	1	4	4	4	4	4	4	4	4	4	2	4	4	4	4	4	4	4	4	4	4	4	4	4	4	4	4	4	4	4	4	4	4	4
53	2024/12/24 12:35:38	2	1	Sports Training	1	4	4	5	4	4	4	4	4	5	3	3	3	4	4	4	4	4	4	4	4	4	4	4	4	4	4	4	4	4	4	4	4	4
54	2024/12/24 12:38:37	2	1	Physical Education	1	5	5	5	4	4	4	3	4	3	4	4	3	4	3	5	4	4	4	5	4	4	4	5	5	5	4	4	4	4	5	3	3	5
55	2024/12/24 13:39:05	2	1	Sports	1	5	5	5	5	5	5	5	5	5	5	5	5	5	5	5	5	5	5	5	5	5	5	5	5	5	5	5	5	5	5	5	5	5
56	2024/12/24 13:44:47	2	1	Physical Education	1	5	5	5	5	5	5	5	5	5	5	5	5	5	5	5	5	5	5	5	5	5	5	5	5	5	5	5	5	5	5	5	5	5
57	2024/12/24 16:36:10	2	1	Physical Education	1	1	4	4	4	4	4	4	4	4	3	3	4	3	4	4	3	4	4	4	4	4	4	4	4	4	4	4	4	4	4	4	4	4
58	2024/12/24 17:59:01	2	1	Physical Education	1	5	5	5	5	5	5	5	5	5	5	5	5	5	5	5	5	5	5	5	5	5	5	5	5	5	5	5	5	5	5	5	5	5
59	2024/12/24 18:03:50	1	2	Community Sports Guidance and Management	1	3	4	5	4	4	3	2	4	4	2	4	3	3	4	5	5	5	5	4	4	3	4	3	4	5	5	3	4	3	4	4	3	4
60	2024/12/24 18:10:48	2	2	Physical Education	1	4	4	4	4	4	5	3	3	5	5	4	5	4	5	4	4	4	4	5	4	4	4	4	5	5	5	5	4	4	3	4	4	4
61	2024/12/24 18:56:55	1	1	Humane and Sociological Science of Sports	1	5	5	5	5	5	5	5	5	5	5	5	5	5	5	5	5	5	5	5	5	5	5	5	5	5	5	5	5	5	5	5	5	5
62	2024/12/24 19:00:39	2	1	Physical Education	2	5	5	5	5	5	5	5	5	5	5	5	5	5	5	5	5	5	5	5	5	5	5	5	5	5	5	5	5	5	5	5	5	5
63	2024/12/24 19:43:44	2	1	Physical Education	1	5	5	5	5	4	4	5	4	3	5	4	4	5	4	5	4	3	4	5	5	5	4	5	5	4	4	5	5	5	5	5	5	5
64	2024/12/24 19:53:16	2	1	Physical Education	1	4	3	3	3	3	4	3	3	3	3	4	2	3	3	3	4	3	4	3	4	4	4	3	3	2	3	4	3	4	3	3	3	4
65	2024/12/24 20:05:43	2	1	Community Sports Guidance and Management	1	4	4	4	4	4	4	4	4	5	5	4	3	4	4	5	3	4	3	4	3	5	3	4	4	4	5	5	4	4	4	3	5	4
66	2024/12/24 20:19:23	1	2	Physical Education	1	4	4	4	4	4	4	4	4	5	2	2	3	3	3	3	3	3	3	5	5	5	5	5	5	4	5	5	4	4	3	3	3	4
67	2024/12/24 20:40:30	1	2	Physical Education	1	4	5	3	5	4	3	3	4	5	4	3	5	4	5	5	4	5	4	5	3	3	4	3	4	5	4	3	3	4	5	5	3	4
68	2024/12/24 20:52:46	2	1	Humane and Sociological Science of Sports	1	3	3	3	3	4	4	4	4	4	2	3	4	3	3	3	3	3	4	4	4	4	4	4	3	4	4	4	4	3	3	3	3	4
69	2024/12/24 21:01:36	2	1	Physical Education	1	4	4	4	4	4	4	4	4	4	4	5	4	4	5	4	5	5	5	4	5	5	5	4	4	5	4	5	4	5	4	4	4	4
70	2024/12/24 21:08:35	1	2	Physical Education	1	2	3	4	2	2	3	2	4	2	5	2	2	4	2	3	4	3	2	3	4	2	2	4	3	4	2	3	3	2	3	4	4	3
71	2024/12/24 21:25:58	1	2	Sports	2	3	3	3	3	3	3	3	3	3	3	3	3	3	3	3	3	3	3	3	3	3	3	3	3	3	3	3	4	4	3	3	3	3
72	2024/12/24 22:13:44	2	2	Physical Education	1	5	5	5	5	5	5	5	5	5	5	5	5	5	5	5	5	5	5	5	5	5	5	5	5	5	5	5	5	5	5	5	5	5
73	2024/12/26 18:30:29	1	1	Physical Education	1	5	5	5	5	5	5	5	5	5	4	5	5	5	5	5	5	5	5	5	5	5	5	5	5	5	5	5	5	5	5	5	5	5
74	2024/12/26 18:31:03	1	2	Physical Education	1	5	5	5	4	4	4	4	4	4	2	4	3	4	4	4	4	4	4	4	4	4	4	4	4	5	4	4	4	4	4	4	4	4
75	2024/12/26 18:31:26	1	1	Physical Education	1	3	3	3	3	3	3	3	3	3	3	3	3	3	3	3	3	3	3	3	3	3	3	3	3	3	3	3	3	3	3	3	3	3
76	2024/12/26 18:32:27	1	1	Physical Education	1	4	4	4	4	4	4	4	4	4	4	4	4	4	4	4	4	4	4	4	4	4	4	4	4	4	4	4	3	3	3	3	3	3
77	2024/12/26 18:32:32	1	1	Physical Education	1	5	5	5	5	5	5	5	5	5	5	5	5	5	5	5	5	5	5	5	5	4	5	4	5	4	5	5	5	5	5	5	5	5
78	2024/12/26 18:33:47	1	1	Physical Education	1	5	5	5	5	5	5	5	5	5	1	5	5	5	5	5	5	5	5	5	5	5	5	5	5	5	5	5	5	5	5	5	5	5
79	2024/12/26 18:35:35	1	2	Physical Education	1	5	5	5	4	3	3	2	4	2	2	4	4	4	4	5	5	4	3	5	5	5	4	4	5	4	5	4	4	4	5	5	5	5
80	2024/12/26 18:37:30	1	1	Physical Education	1	5	5	5	5	5	5	5	5	5	3	3	3	3	3	3	3	5	5	5	5	5	5	5	5	5	5	5	5	5	5	5	5	5
81	2024/12/26 18:38:38	1	1	Physical Education	1	5	5	5	5	5	5	5	5	5	5	5	5	5	5	5	5	5	5	5	5	5	5	5	5	5	5	5	5	5	5	5	5	5
82	2024/12/26 18:39:41	1	1	Physical Education	1	5	5	5	5	5	5	5	5	5	5	5	5	5	5	5	5	5	5	5	5	5	5	5	5	5	5	5	5	5	5	5	5	5
83	2024/12/26 18:43:36	1	1	Physical Education	1	5	5	4	4	4	4	3	3	3	3	3	5	5	5	5	4	4	4	5	4	4	3	3	4	4	4	4	5	4	4	5	4	3
84	2024/12/26 18:48:08	1	1	Physical Education	1	4	4	4	4	4	4	4	4	4	3	3	4	4	4	4	4	4	4	4	4	4	4	4	4	4	4	4	4	4	4	4	4	4
85	2024/12/26 18:48:35	1	1	Physical Education	1	5	4	4	4	4	4	4	5	4	5	4	5	4	5	4	5	4	5	4	5	4	5	5	5	5	4	4	4	4	5	5	4	5
86	2024/12/26 18:52:20	1	1	Physical Education	1	4	4	4	4	4	4	4	4	4	4	4	4	4	4	4	4	4	4	4	4	4	4	4	4	4	4	4	4	4	4	4	4	4
87	2024/12/26 18:59:19	1	1	Physical Education	1	5	5	5	4	4	5	4	5	5	5	5	5	5	5	5	5	5	5	5	5	5	5	5	5	5	5	5	5	5	5	5	5	5
88	2024/12/26 19:11:44	1	1	Sports Training	1	1	1	1	1	1	1	1	1	1	1	1	1	1	1	1	1	1	1	1	1	1	1	1	1	1	1	1	1	1	1	1	1	1
89	2024/12/26 20:37:09	1	1	Physical Education	1	2	2	2	5	4	4	4	4	4	3	4	4	4	4	4	4	4	4	4	4	4	4	4	4	4	4	4	4	4	4	4	4	4
90	2024/12/26 21:35:41	1	1	Sports Kinesiology	1	3	3	3	4	4	4	4	4	4	4	4	4	4	4	4	4	4	4	4	4	4	4	4	4	4	4	4	4	4	4	4	4	4
91	2024/12/27 12:03:42	2	1	Physical Education	1	4	3	3	3	3	3	4	3	3	3	3	4	2	3	3	3	3	3	3	2	3	4	3	3	3	4	4	3	2	3	3	4	3
92	2025/1/4 15:26:12	1	1	Physical Education	1	3	5	5	5	5	5	4	3	5	3	3	5	4	5	4	4	4	5	3	5	4	5	4	4	5	4	5	5	4	3	4	4	5
93	2025/1/4 15:26:27	1	1	Physical Education	1	5	5	5	4	5	4	5	4	5	4	4	4	4	5	4	5	5	4	4	4	3	5	4	5	4	5	4	5	5	5	4	4	5
94	2025/1/4 15:26:43	1	2	Physical Education	1	4	4	4	5	5	4	4	4	3	5	4	5	4	4	5	5	4	5	5	4	5	5	5	5	5	4	5	5	5	5	3	4	4
95	2025/1/4 15:26:59	2	1	Physical Education	1	5	4	4	5	4	5	5	4	5	4	5	4	4	4	5	5	4	4	5	4	4	5	4	5	4	5	4	5	1	4	4	1	5
96	2025/1/4 15:27:02	1	2	Physical Education	2	1	1	1	1	1	1	1	2	2	1	2	2	2	2	2	2	3	2	2	1	1	3	2	3	2	2	1	2	2	1	2	2	3
97	2025/1/4 15:27:14	2	2	Physical Education	1	5	5	4	5	4	3	3	5	4	4	4	4	4	5	4	4	4	5	3	3	5	4	4	3	4	4	5	3	4	5	5	4	3
98	2025/1/4 15:27:30	1	1	Sports Training	1	5	4	4	4	3	4	5	5	3	4	4	1	5	4	3	5	5	4	4	5	5	4	5	3	5	5	4	5	4	5	4	4	5
99	2025/1/4 15:27:30	1	1	Physical Education	2	1	1	2	2	1	3	2	1	2	1	1	1	2	2	2	2	1	1	2	2	1	2	2	2	2	1	1	1	1	2	1	2	2
100	2025/1/4 15:27:44	1	2	Physical Education	1	5	5	5	3	5	3	4	3	4	4	4	3	4	4	3	5	5	5	4	3	4	5	3	4	3	4	4	4	5	4	3	4	5
101	2025/1/4 15:28:01	1	2	Physical Education	1	5	5	4	3	3	3	5	4	3	4	4	5	5	4	4	4	4	3	5	5	4	3	4	4	5	4	5	4	3	3	3	5	4
102	2025/1/4 15:28:01	1	2	Physical Education	2	2	2	3	2	2	1	2	2	1	1	3	1	1	1	2	2	1	2	2	1	2	2	1	2	1	1	3	2	2	1	2	1	1
103	2025/1/4 15:28:01	1	1	Sports Training	1	3	3	5	4	5	5	5	4	5	3	5	3	5	4	4	5	4	4	5	5	4	5	5	3	5	4	3	4	5	5	3	5	5
104	2025/1/4 15:28:10	1	2	Physical Education	1	3	4	5	4	3	3	3	4	5	3	5	5	5	4	3	5	5	4	5	4	5	3	5	4	4	4	5	5	5	4	4	5	4
105	2025/1/4 15:28:13	2	2	Physical Education	2	1	1	2	1	3	1	1	1	1	2	2	2	2	2	1	2	1	1	1	1	1	2	1	1	3	2	1	2	2	3	1	1	1
106	2025/1/4 15:28:13	1	2	Sports Training	1	5	4	5	5	5	4	3	4	5	4	5	4	4	4	5	4	3	5	4	4	5	5	4	5	3	4	3	5	5	4	5	4	5
107	2025/1/4 15:28:35	1	1	Physical Education	1	5	4	3	4	4	3	4	5	5	4	5	3	5	4	3	5	5	4	5	4	3	5	5	3	4	4	4	5	3	5	4	1	4
108	2025/1/4 15:28:35	2	2	Physical Education	2	2	2	1	1	1	1	2	2	1	1	2	1	1	3	3	1	3	2	1	3	2	1	1	2	2	2	1	2	1	1	2	2	3
109	2025/1/4 15:28:52	1	1	Physical Education	1	4	4	5	5	4	5	5	4	5	5	3	4	3	5	4	4	4	4	5	4	5	3	5	5	5	5	5	3	5	5	5	5	3
110	2025/1/4 15:29:05	1	1	Sports Training	1	5	4	5	5	5	5	4	5	4	4	5	5	4	5	4	4	4	4	4	4	5	4	5	5	4	3	5	5	5	5	4	4	4
111	2025/1/4 15:29:05	1	1	Physical Education	1	5	5	5	5	3	4	5	4	4	3	5	3	4	5	3	4	5	5	3	5	3	5	4	1	5	4	3	4	4	3	3	4	5
112	2025/1/4 15:29:06	1	1	Physical Education	2	1	1	2	3	3	1	1	2	2	3	2	1	3	2	2	2	1	2	1	2	1	2	1	1	2	1	2	2	2	2	3	1	2
113	2025/1/4 15:29:15	1	2	Sports Training	1	4	4	5	5	5	5	4	5	5	5	4	3	5	4	5	4	4	4	1	4	3	4	4	3	4	5	4	3	3	4	4	4	4
114	2025/1/4 15:29:29	1	2	Physical Education	2	1	2	1	2	1	1	1	2	2	2	2	1	2	1	2	2	3	1	2	2	2	2	2	2	2	1	3	3	1	1	2	3	1
115	2025/1/4 15:29:33	1	1	Sports Training	1	5	4	5	5	5	5	4	4	5	3	4	5	5	5	5	4	4	3	5	5	4	3	5	3	4	4	4	4	4	5	4	4	5
116	2025/1/4 15:29:44	2	1	Physical Education	1	5	4	5	5	5	5	4	5	5	3	5	5	4	5	4	4	3	5	4	4	4	4	4	4	5	5	5	3	5	5	4	4	1
117	2025/1/4 15:29:45	2	2	Physical Education	2	1	1	1	2	1	2	2	3	2	3	2	1	2	2	3	1	1	2	3	2	2	1	3	1	2	2	1	3	3	2	2	1	2
118	2025/1/4 15:30:00	1	1	Sports Training	1	5	4	3	5	3	5	5	5	5	4	5	5	5	5	4	5	3	4	5	3	3	4	5	5	1	4	4	5	3	4	4	4	4
119	2025/1/4 15:30:01	2	2	Physical Education	1	5	3	4	4	4	5	5	4	3	3	4	4	4	4	3	5	5	5	4	3	4	5	5	1	4	5	5	5	4	5	4	5	4
120	2025/1/4 15:30:06	2	2	Physical Education	2	1	1	2	1	3	2	1	2	2	2	2	2	2	1	2	3	1	2	2	1	1	1	3	2	2	3	3	1	1	2	3	2	2
121	2025/1/4 15:30:17	2	1	Sports Training	1	5	4	5	5	5	5	5	4	5	4	3	5	5	1	3	5	5	4	4	5	4	5	5	4	4	4	4	3	4	4	5	4	4
122	2025/1/4 15:30:18	1	1	Physical Education	2	2	2	1	2	2	3	1	2	1	2	2	1	1	2	1	1	1	1	3	1	1	2	3	2	1	1	3	2	2	1	2	3	1
123	2025/1/4 15:30:27	1	1	Physical Education	1	5	4	5	5	5	5	5	4	5	4	4	4	4	3	3	4	3	3	5	3	4	4	4	5	3	3	3	5	4	4	3	3	3
124	2025/1/4 15:30:31	1	1	Sports Training	1	4	4	5	4	5	3	3	4	3	4	4	4	4	5	5	4	4	4	3	1	4	4	3	4	4	5	4	4	5	4	5	5	4
125	2025/1/4 15:30:32	2	1	Physical Education	2	1	1	1	3	3	1	1	1	2	2	1	3	2	2	1	2	1	1	1	2	2	2	1	2	2	2	1	3	2	1	2	1	1
126	2025/1/4 15:30:47	2	2	Physical Education	1	5	4	1	4	5	5	4	4	5	5	5	4	4	3	4	4	5	4	5	3	5	4	5	5	3	5	4	4	4	3	4	4	5
127	2025/1/4 15:30:49	2	1	Sports Training	1	4	4	5	5	5	4	4	3	5	5	5	4	3	4	4	3	5	5	3	4	3	3	3	5	4	4	5	5	4	5	5	4	3
128	2025/1/4 15:31:03	1	2	Physical Education	1	5	5	5	5	4	5	3	4	4	3	3	5	4	4	4	3	4	5	3	5	4	4	5	4	5	4	5	4	4	5	4	4	4
129	2025/1/4 15:31:05	2	2	Sports Training	1	4	4	5	5	4	4	5	5	4	5	3	3	5	4	5	4	4	4	4	4	3	3	4	5	4	4	3	3	4	3	4	4	4
130	2025/1/4 15:31:18	2	2	Physical Education	2	1	1	3	3	3	2	1	2	2	1	1	1	2	3	3	2	2	3	2	3	1	3	1	3	2	3	3	1	1	3	2	1	2
131	2025/1/4 15:31:20	2	1	Sports Training	1	5	5	5	3	5	4	5	4	5	5	4	5	5	5	3	5	5	4	4	5	4	4	5	4	5	4	4	4	5	5	3	4	4
132	2025/1/4 15:31:35	2	2	Physical Education	2	1	2	2	2	1	3	1	2	1	1	2	1	2	2	3	1	3	2	2	1	3	1	1	3	1	2	2	1	1	1	3	1	1
133	2025/1/4 15:31:39	2	1	Physical Education	1	5	4	5	5	3	4	5	5	5	4	4	3	3	4	5	4	5	4	3	4	3	3	4	3	3	5	3	5	4	3	4	5	5
134	2025/1/4 15:31:51	1	2	Physical Education	2	1	2	3	2	2	1	2	1	1	2	1	2	3	2	1	2	2	1	2	2	2	2	2	1	2	1	2	1	2	3	1	1	2
135	2025/1/4 15:31:53	1	2	Sports Training	1	4	4	5	4	5	5	5	5	5	4	3	4	4	5	4	4	5	3	5	5	5	5	4	4	5	4	5	5	3	5	3	5	5
136	2025/1/4 15:31:55	1	1	Physical Education	1	3	5	5	5	5	3	5	4	5	4	5	3	5	3	5	4	3	4	5	5	4	5	4	3	5	4	4	3	4	3	5	4	5
137	2025/1/4 15:32:07	1	1	Sports Training	1	5	5	5	5	3	5	3	5	4	5	4	4	5	5	4	4	3	5	4	5	4	4	3	4	5	5	5	4	4	5	3	5	4
138	2025/1/4 15:32:08	2	2	Physical Education	2	1	1	1	1	2	3	1	2	2	1	2	3	2	1	1	3	3	2	2	3	2	2	1	2	1	2	1	1	1	1	1	3	1
139	2025/1/4 15:32:14	1	2	Physical Education	1	5	4	3	5	5	4	4	4	5	4	5	4	5	5	3	4	4	5	4	4	4	5	4	4	4	4	4	4	4	4	5	5	4
140	2025/1/4 15:32:23	1	2	Sports Training	1	3	4	4	4	5	5	5	4	4	4	4	5	4	4	4	4	3	5	4	4	4	5	4	5	5	4	4	5	5	3	4	5	5
141	2025/1/4 15:32:24	2	1	Physical Education	2	3	3	2	2	3	1	1	3	1	2	2	1	1	2	1	1	3	3	2	1	1	1	1	2	3	1	1	1	2	3	3	3	1
142	2025/1/4 15:32:31	2	1	Physical Education	1	4	4	5	3	5	4	4	4	5	5	4	5	5	3	4	4	5	5	3	5	4	3	4	5	5	4	3	4	4	3	5	5	5
143	2025/1/4 15:32:41	1	1	Sports Training	1	4	5	5	3	5	5	4	5	5	5	4	5	3	4	5	4	5	3	4	4	4	5	5	4	4	5	3	3	4	5	3	4	3
144	2025/1/4 15:32:42	1	2	Physical Education	2	1	2	2	1	2	2	2	2	3	2	2	2	2	1	3	3	2	2	2	2	1	2	2	3	1	1	1	3	2	1	1	3	3
145	2025/1/4 15:32:56	2	1	Physical Education	1	5	4	4	5	5	5	5	4	5	5	4	4	4	5	1	3	4	3	3	4	5	3	4	3	5	4	4	1	4	5	4	5	4
146	2025/1/4 15:32:57	1	2	Sports Training	1	4	4	4	1	3	5	5	5	5	5	5	5	4	3	4	5	3	5	4	5	4	5	4	4	4	4	5	5	3	5	4	4	5
147	2025/1/4 15:33:14	1	1	Physical Education	1	5	5	3	4	4	4	5	5	4	5	4	5	4	5	5	3	5	3	4	3	4	4	4	5	5	4	5	4	4	1	3	4	5
148	2025/1/4 15:33:15	1	2	Physical Education	2	1	1	2	3	1	2	2	2	2	2	3	1	2	1	2	1	1	1	1	2	1	2	2	1	1	3	2	1	1	1	3	2	1
149	2025/1/4 15:33:17	2	1	Sports Training	1	4	4	5	3	4	5	3	4	5	3	5	5	4	3	5	4	5	4	4	5	3	5	5	3	4	5	4	3	4	5	5	5	4
150	2025/1/4 15:33:30	1	2	Sports Training	1	5	4	4	3	3	5	4	3	5	4	4	5	4	5	4	5	5	5	4	4	5	5	4	4	5	5	5	4	4	5	4	4	3
151	2025/1/4 15:33:30	2	2	Physical Education	2	1	2	1	3	2	3	2	2	1	1	2	2	1	2	3	2	1	1	1	2	2	2	1	2	2	1	1	2	1	1	2	1	2
152	2025/1/4 15:33:32	2	1	Physical Education	1	5	4	5	4	4	5	4	5	3	3	3	5	5	4	4	5	3	4	5	4	4	5	5	4	5	4	4	5	5	3	5	4	4
153	2025/1/4 15:33:47	2	1	Sports Training	1	5	5	3	5	5	5	4	4	4	4	3	4	5	4	4	4	3	5	4	5	3	4	4	3	5	5	5	3	4	5	5	5	4
154	2025/1/4 15:34:00	1	1	Physical Education	1	5	3	5	3	5	5	5	5	5	5	5	5	4	4	4	5	3	4	4	5	4	5	3	4	4	5	3	3	5	4	4	4	5
155	2025/1/4 15:34:02	2	1	Physical Education	2	3	1	3	1	2	1	1	2	2	1	1	2	3	3	2	2	1	1	2	1	1	1	2	2	2	2	2	1	1	2	2	2	1
156	2025/1/4 15:34:17	1	1	Physical Education	1	5	5	3	4	5	3	4	4	3	4	5	5	4	3	5	5	3	5	3	5	4	5	5	5	4	5	3	4	4	3	3	3	3
157	2025/1/4 15:34:18	1	1	Sports Training	1	5	4	5	5	4	5	5	5	1	5	4	5	5	5	4	4	4	4	4	5	3	5	4	5	3	4	4	3	5	5	5	3	5
158	2025/1/4 15:34:19	2	2	Physical Education	2	3	2	1	1	1	1	1	2	2	2	1	1	2	3	2	3	2	2	2	1	1	3	1	1	2	1	1	2	2	1	1	1	2
159	2025/1/4 15:34:33	2	2	Physical Education	2	3	3	3	1	1	3	1	2	1	2	2	1	2	2	2	2	2	1	3	3	3	1	3	3	3	3	1	1	2	2	2	1	1
160	2025/1/4 15:34:34	2	1	Sports Training	1	5	4	5	4	3	4	4	4	5	4	3	5	5	3	4	5	5	3	5	5	5	5	4	5	4	5	4	5	4	5	3	5	5
161	2025/1/4 15:34:51	2	2	Physical Education	2	1	1	1	2	2	2	2	2	2	1	2	2	2	3	2	2	1	1	2	1	3	2	1	2	3	3	1	1	1	3	1	1	1
162	2025/1/4 15:34:51	2	2	Physical Education	1	3	5	4	3	4	5	5	5	5	4	4	4	5	5	4	5	4	5	5	3	4	5	5	4	4	5	5	5	4	4	4	5	4
163	2025/1/4 15:34:53	2	2	Sports Training	1	4	4	5	4	5	5	5	3	5	3	4	4	4	5	4	4	3	5	5	3	4	3	4	5	4	5	4	4	4	3	3	4	4
164	2025/1/4 15:35:08	2	1	Physical Education	1	3	4	1	3	4	3	5	4	5	5	5	4	3	3	3	5	5	3	3	5	5	5	4	3	3	4	4	5	5	3	5	4	4
165	2025/1/4 15:35:09	2	2	Physical Education	2	1	1	2	1	1	1	3	2	2	1	3	1	2	2	1	3	1	3	2	1	2	2	3	1	2	1	2	3	1	1	2	1	1
166	2025/1/4 15:35:22	1	2	Sports Training	1	5	4	4	5	4	5	5	5	5	3	3	5	4	4	5	3	5	4	4	5	5	5	5	5	4	4	4	5	4	5	3	4	5
167	2025/1/4 15:35:24	2	1	Physical Education	2	2	2	1	1	3	1	2	2	2	1	1	2	1	3	3	1	1	2	1	1	2	2	1	2	3	1	1	1	2	3	1	1	1
168	2025/1/4 15:35:39	2	1	Physical Education	1	3	4	5	5	3	5	5	5	3	4	4	4	5	5	5	3	3	4	4	5	5	5	5	4	5	4	5	5	4	4	4	5	4
169	2025/1/4 15:35:40	1	2	Physical Education	2	2	2	2	1	2	3	3	2	1	3	2	2	1	1	1	1	3	1	1	1	2	1	2	3	2	2	2	1	2	2	1	1	2
170	2025/1/4 15:35:41	1	2	Sports Training	1	5	5	4	4	5	5	5	4	5	5	4	4	3	4	5	4	3	4	5	4	4	4	5	4	5	4	4	3	5	3	3	5	4
171	2025/1/4 15:35:56	2	1	Physical Education	2	1	3	2	1	3	2	1	2	2	2	2	1	1	1	2	2	1	2	2	2	2	2	2	1	2	2	2	2	1	1	1	3	3
172	2025/1/4 15:35:57	2	1	Sports Training	1	5	5	4	3	4	5	5	5	5	4	3	3	3	4	5	5	5	4	4	5	5	4	4	4	5	5	5	5	4	5	4	5	4
173	2025/1/4 15:35:57	1	2	Physical Education	1	5	5	4	5	3	3	5	4	5	5	4	4	4	3	4	3	3	4	3	4	4	4	4	5	3	4	5	3	4	5	5	5	5
174	2025/1/4 15:36:13	1	1	Sports Training	1	4	5	5	4	4	4	4	3	5	5	4	4	4	4	4	4	5	4	3	4	5	4	5	5	5	4	5	5	4	5	5	3	3
175	2025/1/4 15:36:14	2	1	Physical Education	1	1	5	5	5	4	4	5	4	5	3	3	5	5	4	5	5	4	5	5	4	4	4	5	4	5	1	5	3	5	4	4	4	3
176	2025/1/4 15:36:15	1	2	Physical Education	2	1	2	1	1	1	2	1	3	1	2	2	2	3	1	1	2	1	2	2	1	2	2	1	1	2	1	2	1	3	1	3	1	2
177	2025/1/4 15:36:29	1	2	Sports Training	1	5	4	3	5	4	5	3	3	5	4	4	3	5	5	5	4	3	5	5	3	5	4	5	5	5	5	4	5	4	3	5	5	5
178	2025/1/4 15:36:29	1	1	Physical Education	2	1	2	1	2	1	2	1	1	1	2	3	3	1	2	2	1	1	2	1	2	1	2	1	1	2	1	3	1	1	1	2	1	2
179	2025/1/4 15:36:30	1	1	Physical Education	1	4	4	5	4	5	5	4	4	5	4	4	5	5	4	3	4	1	4	4	5	4	4	4	4	5	4	4	5	5	5	5	4	5
180	2025/1/4 15:36:45	2	1	Physical Education	1	3	5	3	5	5	4	5	3	4	5	5	4	5	3	3	4	5	5	3	5	4	4	4	4	5	4	5	5	4	5	3	4	4
181	2025/1/4 15:36:46	2	1	Sports Training	1	5	4	5	5	5	4	3	4	5	4	5	5	5	5	4	4	4	5	4	4	4	4	4	4	4	4	4	4	4	4	5	5	3
182	2025/1/4 15:37:01	2	2	Physical Education	2	1	2	3	2	3	1	2	2	1	2	2	2	1	1	2	2	2	2	2	1	1	3	1	2	3	1	1	2	2	1	2	2	1
183	2025/1/4 15:37:19	1	2	Physical Education	1	4	4	5	5	4	5	5	4	3	3	4	4	5	3	5	5	5	4	4	5	5	5	4	4	5	5	4	5	4	3	4	4	5
184	2025/1/4 15:37:20	2	2	Physical Education	2	1	1	1	1	1	1	1	1	1	1	2	3	2	3	2	2	1	1	2	2	1	2	3	1	1	1	1	1	2	1	1	2	3
185	2025/1/4 15:37:35	1	2	Physical Education	2	1	2	2	2	2	3	1	2	2	1	2	2	1	3	2	1	1	2	1	2	1	1	1	1	1	2	2	2	3	3	1	1	1
186	2025/1/4 15:37:38	1	1	Physical Education	1	4	5	3	5	5	5	4	4	4	4	4	4	4	5	3	4	4	4	4	4	5	5	4	5	5	3	5	5	4	4	5	5	5
187	2025/1/4 15:37:51	2	2	Sports Training	1	5	3	5	3	5	5	5	4	5	4	5	4	5	5	5	4	5	5	4	5	4	4	4	4	5	3	4	4	3	5	5	5	4
188	2025/1/4 15:37:53	1	2	Physical Education	2	3	2	1	2	2	1	3	2	1	2	1	2	2	3	2	2	1	1	1	2	2	2	1	1	2	2	3	2	1	2	1	1	3
189	2025/1/4 15:37:53	2	1	Physical Education	1	4	5	4	5	5	5	5	5	5	5	4	4	5	5	4	3	5	4	5	4	3	5	5	4	5	4	5	5	5	4	5	4	5
190	2025/1/4 15:38:08	1	2	Sports Training	1	4	4	4	5	3	3	4	4	3	5	5	5	4	3	5	4	5	4	4	5	3	3	5	4	4	4	5	5	3	4	5	5	5
191	2025/1/4 15:38:10	1	1	Physical Education	1	5	5	4	3	3	4	4	4	4	4	5	4	5	5	4	4	3	4	4	3	5	3	4	5	5	3	3	3	5	5	5	4	5
192	2025/1/4 15:38:24	1	1	Physical Education	2	2	2	2	1	2	2	3	1	1	1	1	2	2	1	3	3	3	2	1	2	2	2	1	2	1	1	2	1	1	2	1	2	3
193	2025/1/4 15:38:24	2	2	Sports Training	1	3	4	4	5	4	5	4	4	4	5	5	5	4	5	5	4	5	4	3	4	5	4	4	4	5	3	5	3	5	1	5	4	4
194	2025/1/4 15:38:40	1	1	Physical Education	2	1	2	1	1	3	1	1	2	1	2	2	2	1	1	2	1	1	2	1	1	2	3	1	3	2	3	1	3	2	2	1	2	1
195	2025/1/4 15:38:41	1	2	Sports Training	1	4	5	4	4	5	5	5	5	5	5	4	5	5	4	3	4	5	4	5	5	5	1	4	5	3	5	4	4	4	4	5	3	5
196	2025/1/4 15:38:58	1	2	Physical Education	1	5	5	5	5	3	4	5	4	5	4	3	5	5	5	3	5	3	4	3	3	4	4	4	4	5	4	3	5	5	4	4	5	5
197	2025/1/4 15:38:59	1	2	Sports Training	1	3	5	5	5	5	5	4	4	4	3	5	4	5	4	3	5	3	4	4	5	4	4	3	4	4	3	4	5	4	3	5	5	4
198	2025/1/4 15:39:00	2	1	Physical Education	2	1	2	1	3	2	3	2	1	2	1	2	2	2	2	3	2	1	2	2	2	1	1	3	1	2	1	2	1	3	1	2	2	3
199	2025/1/4 15:39:15	1	1	Physical Education	1	5	4	5	4	5	5	5	5	3	4	4	4	5	5	3	5	3	3	4	4	4	3	4	3	3	5	4	5	4	4	4	5	5
200	2025/1/4 15:39:15	2	1	Physical Education	2	1	2	1	2	3	1	3	2	1	2	1	1	1	2	3	3	1	1	3	3	1	2	1	1	1	1	1	2	2	2	2	1	1
201	2025/1/4 15:39:31	2	2	Sports Training	1	5	5	5	4	5	5	4	4	3	4	4	5	4	4	5	3	5	3	5	4	4	4	5	5	4	4	4	3	4	4	4	5	4
202	2025/1/4 15:39:31	1	1	Physical Education	1	5	5	5	5	5	5	5	4	4	3	4	4	5	4	4	5	5	4	4	5	5	3	5	3	5	4	5	3	4	4	5	4	3
203	2025/1/4 15:39:31	1	2	Physical Education	2	2	1	1	1	1	3	2	2	1	2	2	2	3	2	2	1	2	2	2	1	2	2	2	2	2	2	2	3	2	3	3	3	2
204	2025/1/4 15:39:47	1	1	Physical Education	2	2	2	2	2	3	3	1	3	3	3	3	3	1	2	2	1	3	2	1	1	2	2	2	1	2	2	1	2	2	3	2	1	3
205	2025/1/4 15:39:47	1	1	Sports Training	1	4	4	5	4	3	4	4	5	5	5	5	5	4	4	4	4	5	4	4	3	5	3	4	3	3	5	5	5	4	4	3	4	5
206	2025/1/4 15:40:03	1	2	Sports Training	1	4	4	4	5	5	5	5	5	4	1	5	5	5	5	5	5	3	3	4	4	5	4	4	4	4	4	3	5	4	4	4	5	5
207	2025/1/4 15:40:04	1	2	Physical Education	2	1	2	2	1	2	2	2	2	3	1	1	1	2	3	2	1	2	1	1	1	1	1	1	2	2	1	3	1	2	3	3	3	2
208	2025/1/4 15:40:07	2	1	Physical Education	1	5	4	5	5	5	5	5	5	4	4	5	4	1	4	4	1	3	4	5	3	4	5	3	5	5	5	5	4	4	4	4	4	3
209	2025/1/4 15:40:16	1	1	Sports Training	1	5	4	4	5	3	5	5	5	3	5	4	4	5	4	3	4	4	3	3	3	5	3	4	4	3	4	3	5	1	5	4	4	5
210	2025/1/4 15:40:19	1	2	Physical Education	1	4	4	4	3	4	5	4	4	5	5	1	3	4	1	4	4	5	5	5	4	5	4	5	5	4	4	3	3	4	3	5	4	5
211	2025/1/4 15:40:35	1	2	Physical Education	1	1	4	4	5	4	4	4	5	4	5	4	5	5	3	4	3	4	3	5	5	4	5	5	5	3	5	4	5	4	4	4	3	4
212	2025/1/4 15:40:50	2	1	Physical Education	2	1	3	1	2	2	2	1	3	1	2	1	2	1	2	1	2	3	1	1	2	2	2	1	2	2	1	3	1	2	2	1	1	2
213	2025/1/4 15:40:50	1	2	Physical Education	1	5	4	4	4	5	5	5	5	4	4	1	4	4	3	3	4	4	5	3	4	5	5	4	5	4	4	5	5	4	4	5	4	4
214	2025/1/4 15:41:06	2	2	Sports Training	1	5	5	5	4	5	4	5	4	4	5	5	4	4	4	4	4	5	4	4	5	5	4	4	4	4	5	3	5	3	5	5	5	3
215	2025/1/4 15:41:08	1	1	Physical Education	2	1	2	1	2	3	1	1	3	2	1	2	2	1	2	2	1	1	3	2	2	2	2	1	2	1	2	2	2	2	1	3	1	1
216	2025/1/4 15:41:08	2	2	Physical Education	1	4	5	1	4	5	5	4	4	4	5	4	4	5	3	4	5	5	5	5	3	5	5	4	5	5	4	3	5	5	3	1	4	4
217	2025/1/4 15:41:16	2	2	Sports Training	1	5	3	5	1	3	5	3	4	4	5	5	5	4	5	4	4	4	5	4	3	1	4	5	4	5	4	4	5	3	4	5	4	5
218	2025/1/4 15:41:16	2	2	Physical Education	2	1	2	1	3	2	2	1	2	2	1	1	1	1	2	2	3	2	2	3	1	2	2	1	2	2	1	2	1	2	1	2	1	1
219	2025/1/4 15:41:34	2	1	Sports Training	1	5	5	5	4	4	5	4	4	5	5	5	4	4	5	5	4	4	4	4	3	4	3	5	4	4	4	3	5	4	3	4	5	4
220	2025/1/4 15:41:35	1	1	Physical Education	2	2	2	2	1	1	1	1	2	1	2	2	2	1	2	1	2	1	2	2	2	2	1	2	1	2	1	1	3	1	1	1	2	1
221	2025/1/4 15:41:49	2	1	Physical Education	1	5	5	3	5	3	4	4	5	5	4	4	3	3	3	4	5	5	3	3	5	4	4	4	5	5	5	5	4	4	5	5	5	3
222	2025/1/4 15:41:51	2	2	Physical Education	2	2	3	1	1	1	1	2	1	2	1	2	1	1	2	2	2	2	2	2	1	2	2	1	1	2	1	1	1	3	1	2	2	1
223	2025/1/4 15:42:06	2	2	Sports Training	1	5	5	4	5	5	4	5	4	4	4	4	5	5	5	4	4	3	3	4	4	4	4	3	5	4	4	4	5	4	3	5	3	5
224	2025/1/4 15:42:06	2	2	Physical Education	2	1	1	2	2	3	3	2	2	1	2	1	2	3	2	3	2	1	2	1	2	1	3	1	2	1	1	2	3	2	1	2	1	2
225	2025/1/4 15:42:07	1	2	Physical Education	1	5	5	4	5	1	5	5	5	5	5	5	4	5	4	5	5	5	4	5	4	4	5	4	5	5	4	4	4	5	5	5	4	4
226	2025/1/4 15:42:22	2	1	Physical Education	1	4	4	5	5	5	3	5	3	3	4	4	3	5	4	3	5	5	5	5	4	4	5	5	4	3	3	5	3	3	5	4	3	5
227	2025/1/4 15:42:22	2	2	Sports Training	1	4	4	5	3	5	5	5	4	3	4	4	3	3	3	4	3	5	4	4	5	4	4	5	5	5	4	4	5	4	3	1	5	5
228	2025/1/4 15:42:23	1	1	Physical Education	2	2	2	1	2	1	3	1	1	2	3	1	2	2	1	3	2	1	2	1	1	1	2	2	1	3	3	1	1	1	3	2	1	1
229	2025/1/4 15:42:38	1	2	Physical Education	1	5	5	5	4	5	5	5	4	4	3	4	4	4	5	5	4	4	4	4	5	3	5	5	4	5	5	3	3	4	5	5	5	3
230	2025/1/4 15:42:39	1	2	Sports Training	1	3	4	4	4	4	4	3	3	5	4	5	4	5	5	4	3	3	3	5	5	5	4	4	5	3	4	5	4	4	4	5	4	3
231	2025/1/4 15:43:19	2	2	Physical Education	1	4	5	3	5	3	5	3	4	5	4	5	5	4	3	5	4	4	5	5	3	5	4	5	5	5	5	5	4	5	4	5	1	4
232	2025/1/4 15:43:24	1	2	Sports Training	1	4	4	4	5	5	4	5	4	4	4	4	4	5	4	4	5	5	5	5	5	4	4	5	4	5	4	4	4	4	4	5	5	5
233	2025/1/4 15:43:33	2	1	Physical Education	2	1	1	1	1	2	2	2	1	1	2	1	1	1	3	3	2	1	2	1	1	1	1	2	2	1	2	1	2	2	3	2	2	3
234	2025/1/4 15:43:49	2	1	Physical Education	1	5	5	3	5	3	4	4	3	4	5	4	5	4	5	5	3	3	3	5	4	4	4	4	5	5	4	3	5	5	3	5	5	3
235	2025/1/4 15:43:55	2	2	Physical Education	2	1	2	1	3	1	1	1	2	3	2	1	2	2	2	1	1	1	1	1	2	2	1	1	2	3	2	1	3	2	1	2	3	2
236	2025/1/4 15:44:06	1	2	Physical Education	1	4	4	3	4	5	4	4	4	4	4	4	5	5	4	5	4	4	5	4	5	4	1	5	4	5	3	4	3	5	5	4	3	3
237	2025/1/4 15:44:20	1	2	Physical Education	2	1	1	1	2	2	1	2	2	2	2	2	1	1	2	2	2	2	2	3	1	3	2	2	2	2	1	2	1	2	1	1	2	2
238	2025/1/4 15:44:22	1	2	Physical Education	1	3	5	5	5	5	3	1	4	3	3	5	5	3	5	4	4	3	4	4	5	5	4	4	5	3	4	5	3	4	5	5	4	4
239	2025/1/4 15:44:36	1	2	Sports Training	1	4	5	5	4	5	5	5	4	4	5	4	3	4	4	3	4	5	4	5	4	3	5	3	4	4	4	4	4	4	5	5	5	3
240	2025/1/4 15:44:38	2	1	Physical Education	1	5	5	5	5	5	5	3	4	4	5	5	3	5	5	5	4	5	5	4	4	1	5	3	4	5	3	4	4	4	4	3	5	3
241	2025/1/4 15:44:53	2	1	Physical Education	1	3	1	5	4	4	5	5	5	5	5	5	5	4	5	3	4	1	4	5	5	4	5	5	4	4	4	4	4	5	3	5	5	5
242	2025/1/4 15:44:54	2	2	Physical Education	2	3	1	2	2	3	2	2	1	1	1	1	1	2	3	1	1	1	2	2	1	2	2	1	2	2	1	2	1	2	1	2	2	2
243	2025/1/4 15:45:11	2	2	Physical Education	1	5	4	3	3	5	3	4	5	5	3	4	3	4	3	4	4	3	4	4	4	5	5	3	4	4	5	5	5	3	5	4	5	4
244	2025/1/4 15:45:11	1	2	Physical Education	1	2	2	1	2	1	2	3	2	1	1	3	3	2	1	1	2	1	1	1	2	3	2	2	1	2	1	2	2	2	2	1	1	1
245	2025/1/4 15:45:25	1	2	Sports Training	1	3	5	5	5	5	5	5	4	5	5	4	3	3	4	5	5	4	5	5	3	5	5	4	3	4	5	4	5	5	4	4	4	4
246	2025/1/4 15:45:27	2	1	Physical Education	1	5	5	5	4	5	5	4	4	4	5	3	4	4	5	5	4	5	5	5	4	4	5	5	4	4	4	5	5	4	5	4	5	5
247	2025/1/4 15:45:28	1	2	Physical Education	2	2	1	3	1	1	1	1	2	1	1	1	2	2	2	1	2	1	1	1	2	2	1	3	1	1	1	2	2	2	2	1	2	3
248	2025/1/4 15:45:42	2	2	Sports Training	1	5	4	5	3	4	5	3	4	5	4	5	4	3	5	4	4	4	4	4	5	5	4	5	5	5	5	4	4	4	5	4	5	4
249	2025/1/4 15:45:44	1	1	Physical Education	2	1	3	1	2	1	2	1	2	1	2	3	1	3	1	1	1	1	2	2	1	3	1	1	2	2	1	2	1	2	1	1	1	1
250	2025/1/4 15:45:45	1	2	Physical Education	1	5	4	3	5	5	3	3	5	4	5	3	4	4	5	1	4	4	4	5	3	4	5	5	5	4	5	5	4	4	5	5	3	4
251	2025/1/4 15:46:00	2	2	Physical Education	1	5	5	5	5	4	3	5	5	3	3	3	4	4	4	4	4	3	3	5	4	4	4	3	4	5	4	5	5	3	3	5	5	3
252	2025/1/4 15:46:00	1	1	Sports Training	1	5	4	3	4	5	4	5	5	3	5	5	5	3	5	4	3	5	4	4	4	4	4	4	4	5	4	3	3	4	3	5	4	5
253	2025/1/4 15:46:01	1	2	Physical Education	2	3	1	1	2	2	3	1	2	1	2	1	1	1	2	2	2	1	2	1	2	3	2	3	3	1	1	3	1	2	1	2	1	1
254	2025/1/4 15:46:16	1	2	Physical Education	2	2	1	1	2	2	3	2	1	1	1	3	2	2	3	2	2	1	1	2	2	2	2	2	1	2	1	1	3	3	3	1	3	1
255	2025/1/4 15:46:16	2	1	Physical Education	1	5	5	5	3	4	4	5	4	4	4	4	4	4	4	5	5	5	4	4	5	5	5	4	4	5	4	1	4	3	3	4	5	5
256	2025/1/4 15:46:17	1	1	Sports Training	1	4	5	3	4	3	5	4	4	4	3	5	5	4	4	5	3	5	4	5	5	5	4	4	4	4	4	3	5	4	4	5	4	4
257	2025/1/4 15:46:32	2	2	Physical Education	2	1	1	1	1	2	1	1	2	2	1	1	2	2	3	1	1	1	2	2	3	1	1	2	2	2	1	1	3	1	1	1	1	3
258	2025/1/4 15:46:32	1	2	Physical Education	1	3	5	5	3	5	4	3	4	4	5	5	5	4	4	4	5	5	4	4	5	4	3	5	4	4	4	4	5	4	5	3	4	5
259	2025/1/4 15:46:34	2	1	Sports Training	1	5	4	4	4	5	4	4	4	3	4	4	5	4	3	5	4	3	4	5	5	5	5	4	5	4	3	3	4	4	4	5	3	5
260	2025/1/4 15:46:49	2	1	Physical Education	2	1	3	2	1	1	3	1	1	1	1	3	1	2	1	3	3	1	2	3	2	2	1	1	3	1	2	1	1	1	3	2	2	1
262	2025/1/4 15:46:50	1	2	Physical Education	1	5	3	5	5	5	5	5	3	5	5	4	5	3	5	5	3	4	5	3	4	4	5	4	3	4	4	4	4	4	3	5	5	3
261	2025/1/4 15:46:50	2	2	Sports Training	1	5	4	3	3	3	4	3	4	5	4	4	3	5	4	5	4	5	4	5	5	4	5	4	4	5	5	5	5	4	3	4	4	5
263	2025/1/4 15:47:07	1	1	Physical Education	1	5	4	5	5	4	5	5	4	4	3	3	4	4	4	4	4	3	4	5	5	4	5	5	3	4	4	4	3	4	5	3	4	4
264	2025/1/4 15:47:07	1	2	Physical Education	2	1	1	1	1	2	1	1	1	3	1	1	1	1	2	2	1	1	1	3	2	2	1	1	2	1	2	1	2	1	2	2	2	1
265	2025/1/4 15:47:21	2	1	Sports Training	1	4	4	5	5	5	5	4	4	5	5	5	3	4	4	4	4	5	5	4	5	5	5	4	4	4	4	5	5	3	4	5	3	4
266	2025/1/4 15:47:23	2	2	Physical Education	2	1	1	2	1	2	1	2	1	3	1	1	1	2	1	2	2	1	2	1	3	2	1	3	1	2	1	1	2	2	3	1	3	1
267	2025/1/4 15:47:39	1	2	Physical Education	2	2	1	1	2	2	1	2	3	1	2	2	2	2	1	1	2	1	1	2	1	2	2	2	1	1	1	1	2	1	3	1	1	2
268	2025/1/4 15:47:40	2	2	Sports Training	1	4	4	5	5	3	5	4	5	5	5	5	3	5	5	5	5	3	4	4	5	4	4	5	5	4	4	3	5	5	5	5	5	5
269	2025/1/4 15:47:54	1	1	Sports Training	1	3	5	5	3	4	5	5	4	5	4	4	3	4	4	3	4	5	4	5	4	5	3	4	5	4	5	5	5	3	3	5	5	3
270	2025/1/4 15:47:56	2	1	Physical Education	2	1	3	1	3	1	3	1	1	2	3	2	3	1	2	1	1	1	2	3	2	1	2	1	1	1	2	2	1	2	1	1	2	1
271	2025/1/4 15:48:14	1	1	Sports Training	1	5	3	5	3	5	5	3	4	5	4	4	5	4	4	4	4	4	5	3	4	3	5	4	5	5	3	5	5	5	5	5	4	4
272	2025/1/4 15:48:14	2	1	Physical Education	1	4	5	5	5	4	5	5	5	5	5	4	3	3	3	5	4	5	4	4	3	4	4	5	5	5	4	4	4	4	4	3	4	5
273	2025/1/4 15:48:17	2	1	Physical Education	2	1	1	2	1	3	1	1	2	2	1	1	1	3	2	3	2	2	3	2	2	1	2	2	1	1	2	2	2	3	3	2	1	2
274	2025/1/4 15:48:28	2	2	Sports Training	1	3	4	4	5	3	5	4	4	4	5	5	4	3	5	4	3	4	4	5	4	4	4	4	3	4	5	5	5	4	4	4	4	5
275	2025/1/4 15:48:29	2	2	Physical Education	2	1	1	1	1	2	1	2	1	1	3	2	1	1	2	3	2	2	2	1	2	1	3	1	2	2	2	3	2	2	1	1	2	2
276	2025/1/4 15:48:44	1	2	Physical Education	1	5	4	5	5	4	3	5	4	4	5	4	5	1	3	3	5	5	5	5	3	4	1	5	4	4	4	4	5	1	4	5	4	5
277	2025/1/4 15:48:46	1	1	Sports Training	1	5	5	4	3	5	5	4	5	5	5	3	4	3	5	5	5	3	5	5	5	3	4	4	5	5	4	5	4	4	4	5	4	5
278	2025/1/4 15:48:46	1	1	Physical Education	2	1	2	1	1	1	3	2	3	1	2	1	2	2	1	1	2	3	2	2	2	2	2	1	2	3	2	2	2	3	2	2	1	1
279	2025/1/4 15:49:01	1	2	Sports Training	1	4	4	5	3	4	5	3	5	3	1	4	5	5	5	5	4	1	4	4	4	5	4	4	5	5	4	3	3	5	5	5	4	4
280	2025/1/4 15:49:18	2	2	Physical Education	1	4	3	4	3	3	4	5	4	5	4	4	3	4	3	5	5	5	4	5	4	4	4	5	5	5	4	5	4	5	5	3	4	5
281	2025/1/4 15:49:19	1	2	Sports Training	1	5	5	4	4	5	5	4	4	5	4	5	3	3	5	5	4	5	5	3	5	5	4	4	5	3	5	4	3	4	4	4	3	3
282	2025/1/4 15:49:34	2	1	Physical Education	1	3	3	5	3	3	5	4	3	5	4	4	3	4	5	5	4	5	5	3	4	5	3	5	5	4	4	5	4	5	3	5	5	5
283	2025/1/4 15:49:35	2	2	Physical Education	2	1	2	1	1	3	3	1	1	1	2	1	1	3	1	1	2	1	1	1	2	2	2	3	2	2	2	2	1	2	2	2	3	1
284	2025/1/4 15:49:37	1	1	Sports Training	1	4	5	5	3	5	4	3	4	5	5	3	4	1	4	4	4	5	4	4	4	4	4	5	4	4	5	4	4	5	5	5	4	5
285	2025/1/4 15:49:51	2	2	Physical Education	2	2	2	1	1	3	2	1	2	2	3	1	1	2	3	2	2	2	1	2	2	1	2	1	2	1	2	2	3	1	1	1	2	1
286	2025/1/4 15:49:53	1	2	Sports Training	1	5	4	5	4	5	3	4	3	3	4	3	5	4	4	3	5	4	4	5	5	5	5	5	3	5	4	3	5	5	4	5	5	4
287	2025/1/4 15:50:08	2	2	Physical Education	1	4	4	5	5	5	4	5	4	4	4	3	4	5	1	5	4	5	4	5	4	5	5	5	5	5	4	4	5	4	3	5	5	5
288	2025/1/4 15:50:10	2	1	Sports Training	1	5	3	4	5	4	4	5	3	5	4	4	4	4	4	4	4	4	5	5	5	5	5	1	5	4	4	5	4	4	4	5	4	4
289	2025/1/4 15:50:10	2	2	Physical Education	2	1	2	3	1	3	1	2	1	3	1	3	1	1	1	2	1	1	1	1	2	2	3	1	1	2	1	2	2	2	1	2	1	1
290	2025/1/4 15:50:25	2	1	Physical Education	2	1	1	2	2	1	1	1	2	2	1	2	2	2	3	2	2	2	1	2	1	2	1	2	2	3	2	3	2	2	3	1	1	1
291	2025/1/4 15:50:27	1	1	Physical Education	1	5	4	5	5	3	3	5	5	5	3	3	4	4	4	4	5	5	4	5	5	5	5	4	5	4	5	3	5	3	5	4	4	4
292	2025/1/4 15:50:31	1	2	Sports Training	1	3	4	5	3	3	4	4	4	4	4	5	4	5	3	3	3	3	5	3	3	4	4	4	4	4	4	4	4	4	4	5	1	1
293	2025/1/4 15:50:42	1	2	Physical Education	2	3	2	2	2	1	2	1	2	1	1	1	2	2	2	2	2	3	3	1	2	1	2	2	1	3	1	3	2	2	1	1	3	2
294	2025/1/4 15:50:43	2	1	Physical Education	1	5	5	5	5	3	5	3	4	4	4	5	4	5	1	3	4	5	4	5	5	4	4	4	3	3	5	4	5	4	5	5	4	5
295	2025/1/4 15:51:00	1	2	Physical Education	2	1	2	1	1	3	2	1	2	3	3	1	2	2	1	1	2	2	1	1	3	2	3	1	2	2	3	1	1	2	1	2	1	1
296	2025/1/4 15:51:00	1	1	Physical Education	1	5	5	5	4	4	5	5	4	4	3	5	4	5	5	4	4	4	4	5	5	4	5	4	5	4	5	4	4	4	5	5	5	5
297	2025/1/4 15:51:16	1	1	Sports Training	1	5	5	5	5	4	5	5	3	5	4	4	5	4	3	5	4	4	4	5	3	3	5	4	3	5	4	3	5	5	4	5	5	5
298	2025/1/4 15:51:17	2	1	Physical Education	2	3	1	1	1	2	1	1	2	1	1	2	3	1	1	3	2	2	2	2	1	2	1	3	2	1	1	2	1	1	1	2	3	3
299	2025/1/4 15:51:31	2	2	Sports Training	1	4	5	4	5	4	4	1	5	5	5	4	3	5	4	4	4	4	4	5	4	4	5	1	5	5	4	4	5	4	5	5	4	5
300	2025/1/4 15:51:32	1	2	Physical Education	1	4	4	5	5	1	5	5	4	3	5	4	4	5	5	4	5	4	5	5	5	5	4	4	4	4	5	5	4	4	1	4	4	5
301	2025/1/4 15:51:50	1	1	Physical Education	2	1	2	2	1	1	3	3	2	2	2	2	1	1	2	2	2	1	2	1	1	2	1	2	2	1	2	1	1	2	2	1	2	2
302	2025/1/4 15:51:50	2	2	Physical Education	1	1	4	5	5	4	3	5	4	5	3	5	5	3	3	4	4	5	4	5	4	4	5	3	4	4	5	3	3	5	5	5	4	3
303	2025/1/4 15:51:51	2	1	Sports Training	1	5	5	5	4	4	3	4	5	5	3	5	4	5	4	4	5	5	4	5	5	4	5	5	5	4	4	5	4	5	4	5	4	5
304	2025/1/4 15:52:05	1	2	Physical Education	2	1	1	1	2	1	1	3	1	1	2	2	1	3	2	2	3	2	1	1	3	1	2	3	2	2	2	1	1	1	2	1	2	1
305	2025/1/4 15:52:07	2	1	Physical Education	1	3	5	4	4	5	3	5	5	5	4	5	5	3	5	4	5	4	4	3	1	5	3	4	5	5	4	5	3	4	5	4	5	5
306	2025/1/4 15:52:10	2	2	Sports Training	1	5	4	5	5	5	4	4	4	4	5	4	4	5	4	4	4	5	4	5	5	5	3	5	3	3	4	4	3	4	4	3	5	5
307	2025/1/4 15:52:28	1	2	Physical Education	2	1	1	3	2	1	1	2	2	2	1	3	2	2	3	3	3	2	1	2	1	2	1	3	1	2	3	2	2	2	1	2	2	1
308	2025/1/4 15:52:29	2	2	Physical Education	1	5	4	5	4	4	5	5	4	4	5	5	5	4	5	4	4	5	5	3	3	4	5	4	4	5	4	5	3	3	3	4	3	4
309	2025/1/4 15:52:45	1	2	Physical Education	1	5	4	4	5	5	4	5	5	4	4	3	3	5	3	5	4	5	3	5	3	4	5	3	3	4	3	3	4	5	4	3	4	4
310	2025/1/4 15:52:46	1	1	Physical Education	2	1	2	2	1	3	1	1	1	3	2	2	1	2	1	1	2	1	1	1	1	2	1	2	2	1	1	1	3	1	1	2	2	3
311	2025/1/4 15:53:03	1	1	Physical Education	1	4	5	4	5	4	4	3	5	5	4	5	5	4	5	4	4	5	4	5	4	3	4	4	4	4	3	4	3	5	5	5	4	3
312	2025/1/4 15:53:18	2	2	Physical Education	2	1	2	3	3	3	2	1	2	1	1	1	1	1	3	2	1	3	2	3	1	1	3	3	2	1	1	1	1	1	1	1	2	2
313	2025/1/4 15:53:18	2	2	Sports Training	1	5	3	5	5	4	4	3	4	5	3	3	3	4	5	3	4	4	5	5	4	5	5	5	4	5	5	3	4	4	5	3	5	3
314	2025/1/4 15:53:19	2	1	Physical Education	1	4	4	5	3	4	5	5	4	4	4	4	5	4	4	4	3	4	5	5	4	1	4	4	3	5	5	3	5	5	5	5	4	5
315	2025/1/4 15:53:35	1	2	Physical Education	2	1	2	2	1	2	2	1	2	1	2	2	2	2	1	1	2	1	2	1	2	1	2	2	1	1	2	1	3	2	2	3	1	1
316	2025/1/4 15:53:37	1	2	Physical Education	1	3	5	5	5	3	5	5	4	3	4	4	4	3	5	5	4	3	4	5	5	4	3	4	4	5	4	5	5	4	3	4	5	1
317	2025/1/4 15:53:52	2	1	Physical Education	1	4	5	4	5	4	5	5	5	5	5	5	4	4	5	5	4	5	3	1	4	4	3	5	3	5	4	5	3	4	3	4	5	5
318	2025/1/4 15:53:53	2	2	Physical Education	2	1	2	1	3	1	2	1	3	2	2	1	2	3	1	3	2	3	3	2	1	2	3	1	2	1	3	2	3	2	2	3	2	2
319	2025/1/4 15:54:05	2	2	Physical Education	1	4	3	4	5	5	3	5	5	4	5	4	5	4	4	4	3	5	5	4	4	4	5	3	5	4	4	4	3	4	5	5	5	5
320	2025/1/4 15:54:09	2	1	Sports Training	1	4	3	4	4	4	5	5	4	5	5	3	5	4	5	3	4	4	5	5	5	4	4	5	4	5	5	4	5	4	4	5	4	5
321	2025/1/4 15:54:09	2	1	Physical Education	2	2	1	3	1	1	2	1	1	1	2	2	1	2	1	2	1	2	2	1	2	2	3	1	1	2	2	1	2	2	1	1	3	2
322	2025/1/4 15:54:32	1	1	Physical Education	1	4	4	3	5	3	5	5	4	5	4	5	5	4	3	5	4	4	4	4	5	4	4	4	4	5	5	5	5	4	5	1	3	5
323	2025/1/4 15:54:33	1	1	Physical Education	2	2	1	1	3	1	3	1	1	3	3	1	1	1	1	3	1	2	2	3	2	2	3	2	2	2	2	1	1	2	1	3	3	3
324	2025/1/4 15:54:49	1	2	Sports Training	1	4	3	4	5	5	5	3	5	5	4	4	5	5	3	5	4	3	4	3	3	4	4	4	4	4	4	4	4	4	5	5	4	5
325	2025/1/4 15:54:51	2	2	Physical Education	2	1	1	3	2	1	2	2	2	1	1	3	1	3	1	1	1	1	2	2	2	3	1	2	2	1	2	2	1	2	1	2	1	2
326	2025/1/4 15:55:06	1	1	Physical Education	1	4	3	4	5	4	5	5	5	3	5	4	5	4	4	5	5	3	4	5	3	4	3	4	5	4	3	5	4	4	4	3	5	5
327	2025/1/4 15:55:07	2	1	Sports Training	1	4	4	5	4	4	4	4	3	4	5	5	5	4	5	5	5	4	5	3	5	5	4	4	3	5	4	3	4	3	4	3	5	5
328	2025/1/4 15:55:22	1	1	Physical Education	1	4	3	5	5	5	5	3	4	3	3	3	3	4	4	5	4	5	5	4	5	4	3	4	3	5	4	5	5	4	5	3	4	5
329	2025/1/4 15:55:22	1	2	Physical Education	2	1	1	1	2	2	1	2	2	1	2	1	3	1	3	1	3	1	2	2	1	1	2	2	2	2	2	1	1	1	2	1	3	2
330	2025/1/4 15:55:39	2	1	Physical Education	2	1	2	1	3	1	1	2	3	2	2	3	1	1	2	2	2	1	1	2	2	2	2	3	1	2	2	2	1	2	1	1	2	2
331	2025/1/4 15:55:40	2	2	Physical Education	1	5	5	5	4	5	4	3	5	4	4	5	3	4	5	4	5	4	5	4	5	4	5	4	5	4	4	3	5	4	4	4	5	5
332	2025/1/4 15:55:44	2	2	Sports Training	1	5	4	5	5	4	5	4	5	4	5	3	5	4	4	5	4	3	4	5	5	5	4	4	4	5	3	5	5	3	3	5	3	5
333	2025/1/4 15:55:55	1	1	Physical Education	2	1	2	1	2	3	1	1	1	2	3	2	2	2	2	2	2	1	1	1	2	3	1	3	2	2	2	1	1	2	3	2	1	2
334	2025/1/4 15:55:58	1	1	Physical Education	1	4	4	5	3	4	4	5	3	5	4	3	5	5	4	1	4	5	4	5	5	5	5	4	4	4	3	3	5	5	5	5	4	5
335	2025/1/4 15:56:11	2	1	Sports Training	1	5	4	5	5	4	4	5	3	5	5	3	3	4	5	4	5	4	4	4	4	4	5	4	3	4	4	4	5	3	3	5	5	4
336	2025/1/4 15:56:12	1	2	Physical Education	2	2	2	2	3	3	2	2	2	2	3	2	1	3	1	1	1	2	2	3	2	2	2	1	2	2	3	3	1	2	1	1	2	2
337	2025/1/4 15:56:14	1	1	Physical Education	1	5	4	5	4	5	5	4	3	3	5	5	4	4	5	5	5	3	5	4	4	4	5	4	4	1	3	5	4	4	3	4	4	5
338	2025/1/4 15:56:29	1	2	Physical Education	2	2	1	1	1	3	2	2	3	3	2	2	2	1	1	2	3	1	2	1	2	1	1	3	3	2	1	2	2	2	3	2	2	3
339	2025/1/4 15:56:30	2	1	Sports Training	1	5	4	3	5	4	4	4	5	5	5	4	4	4	4	5	4	3	5	5	5	4	5	5	3	5	1	4	3	4	5	4	4	4
340	2025/1/4 15:56:45	2	2	Physical Education	1	4	3	5	3	3	4	5	4	4	5	4	5	5	5	5	3	4	5	1	5	5	3	5	3	5	4	5	3	4	5	5	5	3
341	2025/1/4 15:57:03	2	1	Physical Education	1	5	4	5	5	5	4	5	4	4	5	5	5	5	3	3	5	5	5	4	4	5	4	4	4	4	5	5	3	5	5	5	4	4
342	2025/1/4 15:57:04	2	2	Physical Education	2	2	2	1	2	2	1	1	2	3	3	3	2	1	1	1	2	1	3	2	1	3	2	1	2	2	2	2	1	2	1	1	1	1
343	2025/1/4 15:57:20	1	1	Physical Education	1	5	4	5	4	4	4	5	4	4	4	4	5	5	4	3	4	5	4	5	5	4	4	5	5	4	5	5	5	4	4	5	5	5
344	2025/1/4 15:57:24	2	1	Physical Education	2	1	2	2	1	2	1	1	1	1	3	2	2	3	3	2	2	1	2	3	1	2	2	3	2	2	2	1	2	2	1	2	1	1
345	2025/1/4 15:57:35	2	2	Physical Education	1	5	4	5	5	4	3	4	4	4	5	4	5	4	4	5	4	5	5	4	4	3	5	5	5	5	5	3	5	4	3	4	5	5
346	2025/1/4 15:57:37	1	2	Physical Education	2	2	1	2	1	2	1	3	1	3	3	2	2	2	1	1	1	3	2	2	2	1	2	3	2	2	2	3	1	2	1	2	1	2
347	2025/1/4 15:57:55	1	1	Sports Training	1	5	4	5	5	4	5	1	3	5	5	5	5	5	3	4	4	4	3	4	5	5	5	4	5	4	4	5	3	5	3	5	5	3
348	2025/1/4 15:57:55	2	1	Physical Education	2	1	3	1	3	2	2	2	1	3	1	1	1	3	1	1	1	1	2	1	1	3	1	1	2	2	2	2	1	1	1	1	2	3
349	2025/1/4 15:58:09	2	1	Sports Training	1	5	4	3	5	3	4	4	5	4	4	5	4	4	3	4	3	5	4	5	5	5	5	4	4	5	4	4	5	5	5	5	5	5
350	2025/1/4 15:58:10	2	1	Physical Education	1	5	5	5	5	4	5	5	4	4	4	3	4	4	4	3	3	4	4	4	4	4	5	4	3	4	4	5	4	4	4	4	5	1
351	2025/1/4 15:58:11	2	2	Physical Education	2	3	2	2	1	2	2	1	2	3	2	1	2	1	1	1	3	3	1	2	2	1	1	3	1	2	2	2	3	2	1	1	1	2
352	2025/1/4 15:58:26	1	1	Sports Training	1	4	5	5	3	5	3	3	4	5	4	3	4	5	4	5	4	4	4	3	5	4	5	5	5	4	3	4	5	5	4	5	5	4
353	2025/1/4 15:58:26	2	1	Physical Education	2	1	1	2	2	2	2	1	2	2	1	1	1	2	1	2	1	1	1	2	2	2	2	3	3	2	1	2	1	2	3	1	2	1
354	2025/1/4 15:58:29	1	1	Physical Education	1	5	5	5	4	5	4	5	3	3	4	5	4	4	3	4	5	4	5	4	5	4	4	3	5	5	3	5	5	4	4	5	4	4
355	2025/1/4 15:58:44	2	1	Sports Training	1	5	5	5	4	4	5	5	4	4	5	4	5	4	4	5	4	3	4	4	4	5	5	5	5	4	4	4	5	4	3	5	4	4
356	2025/1/4 15:58:47	2	2	Physical Education	1	4	4	4	5	5	4	5	3	5	5	4	4	5	5	4	3	3	5	5	5	5	5	5	4	5	5	5	5	4	4	5	5	4
357	2025/1/4 15:59:01	2	2	Sports Training	1	4	4	5	5	5	5	3	4	1	4	3	3	4	4	4	5	1	5	3	5	5	4	5	4	4	5	4	3	5	4	4	5	4
358	2025/1/4 15:59:02	1	1	Physical Education	1	3	4	5	4	5	5	4	4	5	4	5	4	4	4	5	5	3	5	4	5	5	4	4	4	3	4	4	3	5	5	5	5	4
359	2025/1/4 15:59:02	1	1	Physical Education	2	3	1	3	1	1	2	1	1	1	2	1	1	2	1	1	2	1	2	2	2	2	1	2	1	2	3	3	1	1	2	1	2	3
360	2025/1/4 15:59:20	2	2	Physical Education	2	1	1	2	1	3	1	1	2	3	2	2	1	2	1	2	2	1	2	2	1	2	2	2	2	1	2	2	1	2	1	3	1	2
361	2025/1/4 15:59:35	1	1	Physical Education	1	4	5	5	5	5	4	4	3	5	4	5	5	5	4	3	4	4	5	4	4	4	3	4	4	3	4	5	5	1	5	5	4	5
362	2025/1/4 15:59:36	1	1	Sports Training	1	4	4	3	5	5	5	5	4	4	5	3	4	4	3	3	3	4	5	3	4	4	5	4	5	4	3	5	5	4	5	3	5	5
363	2025/1/4 15:59:39	1	1	Physical Education	2	1	2	2	1	2	1	1	1	1	2	1	2	1	2	2	1	2	2	2	2	3	1	1	3	3	2	2	2	2	2	1	1	2
364	2025/1/4 15:59:53	1	1	Sports Training	1	4	5	5	5	5	5	5	4	5	4	4	4	4	5	4	4	3	5	4	4	4	5	5	1	4	3	5	5	4	5	5	5	5
365	2025/1/4 15:59:54	1	2	Physical Education	1	4	1	4	5	4	4	5	4	3	3	4	5	3	5	4	4	5	4	4	4	4	4	4	4	5	3	5	5	4	4	4	4	3
366	2025/1/4 16:00:12	2	1	Physical Education	1	5	5	5	5	5	5	5	4	5	5	3	4	5	5	5	4	4	4	5	5	5	4	4	5	4	5	5	5	5	4	3	4	5
367	2025/1/4 16:00:13	1	2	Sports Training	1	5	4	3	5	4	5	5	4	3	4	3	5	5	4	4	5	5	4	4	5	4	5	5	5	3	4	3	4	4	5	5	5	1
368	2025/1/4 16:00:30	1	1	Physical Education	2	1	1	1	1	1	1	1	2	2	3	1	1	1	1	2	3	3	3	2	2	2	2	2	2	2	2	1	2	2	1	1	2	1
369	2025/1/4 16:00:30	2	1	Sports Training	1	5	3	4	3	5	3	5	4	5	4	3	5	4	5	5	4	5	5	1	4	4	4	4	4	4	5	4	4	4	5	5	5	5
370	2025/1/4 16:00:46	1	1	Physical Education	1	5	4	4	5	5	5	3	4	3	5	4	4	4	5	4	4	5	4	4	4	5	3	3	3	3	4	4	5	5	5	4	4	5
371	2025/1/4 16:00:46	1	2	Physical Education	2	2	1	2	2	1	3	2	2	1	1	1	1	2	3	1	2	1	2	3	2	3	1	2	2	2	1	2	2	2	3	1	2	3
372	2025/1/4 16:00:47	1	1	Sports Training	1	5	5	5	5	4	4	5	5	5	4	5	3	4	4	5	4	1	3	4	5	5	5	5	5	4	3	3	5	3	5	5	5	5
373	2025/1/4 16:01:02	1	2	Sports Training	1	5	5	4	5	5	5	4	4	4	3	4	3	4	5	4	5	4	4	3	5	4	4	4	3	5	5	5	5	3	4	3	4	5
374	2025/1/4 16:01:03	1	1	Physical Education	2	3	1	2	3	3	1	1	1	1	3	1	1	1	3	1	1	1	2	1	1	2	3	1	1	1	1	2	3	2	1	1	2	2
375	2025/1/4 16:01:18	2	1	Physical Education	1	4	4	4	4	4	4	5	4	5	5	5	4	4	5	3	3	5	5	5	4	4	4	4	4	3	5	4	4	3	3	4	4	4
376	2025/1/4 16:01:20	2	1	Physical Education	2	2	1	1	1	2	1	1	2	2	1	1	2	2	2	2	2	2	1	3	2	1	2	3	2	2	1	1	3	2	2	2	1	3
377	2025/1/4 16:01:21	2	1	Sports Training	1	4	4	5	5	4	4	5	5	5	5	3	4	3	4	5	5	3	5	4	5	4	4	5	3	4	4	5	5	5	4	4	4	4
378	2025/1/4 16:01:36	2	1	Physical Education	2	3	1	2	1	3	2	2	2	1	1	2	2	2	3	2	2	2	3	1	1	2	3	1	1	2	2	1	3	2	3	2	1	1
379	2025/1/4 16:01:37	2	2	Sports Training	1	4	4	3	4	3	4	4	4	4	3	3	4	4	4	3	3	4	5	5	4	5	3	3	4	5	3	4	3	5	3	4	4	4
380	2025/1/4 16:01:53	2	2	Sports Training	1	4	3	4	4	4	4	4	5	5	4	5	4	4	5	5	3	5	4	4	1	5	4	4	3	3	5	4	5	4	3	5	5	4
381	2025/1/4 16:01:58	1	2	Physical Education	1	4	5	4	4	5	5	4	5	3	5	4	4	5	5	5	1	3	5	5	4	3	4	4	3	5	3	4	3	5	4	3	5	5
382	2025/1/4 16:02:10	2	1	Sports Training	1	3	4	5	5	4	5	5	4	5	4	4	4	4	5	4	4	5	4	4	5	3	4	4	5	4	4	4	4	5	3	4	5	4
383	2025/1/4 16:02:10	1	1	Physical Education	2	1	1	1	1	2	3	1	1	3	2	2	3	1	2	2	2	1	2	2	1	2	1	1	1	2	1	1	2	2	1	2	1	1
384	2025/1/4 16:02:11	2	2	Physical Education	1	5	4	5	3	5	4	5	4	5	5	4	5	5	5	4	4	3	5	5	4	3	5	5	5	3	5	5	5	5	5	3	3	4
385	2025/1/4 16:02:26	1	2	Physical Education	1	3	4	3	5	5	5	4	4	5	5	4	5	4	5	5	3	3	4	5	4	5	5	4	5	5	5	5	5	4	4	4	4	5
386	2025/1/4 16:02:27	2	2	Sports Training	1	4	4	5	4	5	4	4	5	4	4	4	5	4	4	5	5	5	4	5	5	5	4	4	3	4	4	4	4	4	3	5	5	3
387	2025/1/4 16:02:29	1	1	Physical Education	2	1	1	3	3	1	1	1	2	2	1	2	2	1	1	2	1	1	2	3	3	2	3	1	3	2	2	2	1	1	2	3	1	1
388	2025/1/4 16:02:44	2	2	Sports Training	1	5	4	5	4	3	3	3	5	5	4	5	5	5	4	3	3	4	4	5	5	5	3	4	5	3	4	4	4	4	5	5	5	4
389	2025/1/4 16:02:46	1	2	Physical Education	2	1	1	1	1	1	2	1	1	3	2	1	2	1	1	2	2	2	1	2	2	1	1	2	2	2	2	3	1	2	1	3	2	1
390	2025/1/4 16:03:00	1	2	Physical Education	1	5	4	5	4	5	5	5	4	5	4	4	4	5	4	3	5	4	3	4	5	4	5	5	4	5	4	4	4	3	3	3	5	3
391	2025/1/4 16:03:00	1	2	Physical Education	2	2	1	1	1	2	2	1	2	2	1	2	1	2	1	1	2	3	2	1	2	2	2	3	3	1	2	2	2	2	2	2	1	2
392	2025/1/4 16:03:01	1	1	Sports Training	1	5	5	3	4	3	4	5	5	5	5	5	5	5	4	4	4	3	5	4	5	5	4	5	5	5	4	4	5	5	4	5	5	3
393	2025/1/4 16:03:18	2	2	Physical Education	2	2	2	2	1	1	1	1	1	1	2	1	2	1	1	2	2	2	2	1	1	1	3	2	1	2	3	3	2	1	2	1	1	2
394	2025/1/4 16:03:34	2	2	Physical Education	1	4	4	4	4	3	3	5	4	4	4	3	4	4	4	4	5	5	3	5	5	4	4	4	4	4	4	5	4	4	4	4	5	3
395	2025/1/4 16:03:35	2	1	Physical Education	2	1	2	1	2	2	1	1	2	1	1	1	1	2	1	1	2	3	1	2	2	2	3	1	1	2	3	2	2	2	1	1	1	1
396	2025/1/4 16:03:51	2	1	Physical Education	1	5	4	5	4	5	4	5	4	3	4	5	5	5	4	4	5	4	4	5	5	3	5	5	4	4	5	5	5	4	4	5	4	4
397	2025/1/4 16:03:52	1	2	Sports Training	1	4	4	4	5	5	5	5	4	3	5	5	4	5	3	4	4	4	4	3	5	5	4	3	4	5	4	5	5	4	4	5	4	3
398	2025/1/4 16:03:53	1	1	Physical Education	2	1	1	2	2	2	2	1	2	1	2	2	1	2	2	2	1	2	2	1	2	3	1	2	2	2	3	3	1	1	1	1	2	1
399	2025/1/4 16:04:06	2	2	Physical Education	2	1	3	1	2	2	1	1	1	1	2	2	2	3	1	2	2	1	1	1	2	1	1	2	2	2	2	1	1	3	2	1	3	3
400	2025/1/4 16:04:07	1	2	Physical Education	1	4	5	3	4	3	4	5	5	5	5	5	3	5	5	3	4	3	4	5	4	4	4	3	4	4	5	5	5	4	3	5	4	5
401	2025/1/4 16:04:30	1	2	Physical Education	2	2	1	1	1	2	3	1	2	2	1	2	2	1	1	2	2	1	2	2	1	2	1	1	2	2	1	2	2	2	2	2	2	1
402	2025/1/4 16:04:31	2	1	Physical Education	1	4	4	4	5	5	5	5	3	5	4	4	5	5	4	4	3	3	5	3	5	4	4	4	5	4	4	4	5	4	4	1	5	4
403	2025/1/4 16:04:33	2	1	Sports Training	1	5	3	5	3	4	4	5	3	5	4	4	4	4	5	4	3	5	4	3	4	3	3	4	5	5	4	4	3	5	5	3	5	3
404	2025/1/4 16:04:47	1	1	Physical Education	2	1	2	1	2	1	2	1	2	2	2	2	2	1	2	1	3	2	1	2	1	1	3	2	1	2	2	1	1	3	1	2	2	2
405	2025/1/4 16:04:48	2	2	Physical Education	1	5	5	5	3	4	5	4	4	5	5	5	4	4	4	3	5	4	5	4	5	5	4	4	4	3	4	4	5	5	4	5	5	5
406	2025/1/4 16:05:05	2	1	Physical Education	2	1	2	2	3	1	2	1	1	2	1	3	2	2	2	1	3	2	2	1	1	1	1	2	1	2	2	1	3	1	1	2	2	1
407	2025/1/4 16:05:07	2	1	Sports Training	1	5	4	4	5	4	5	4	4	5	5	5	3	5	4	4	4	3	4	5	5	4	4	4	4	4	3	4	3	4	5	4	4	3
408	2025/1/4 16:05:07	2	1	Physical Education	1	5	4	5	5	4	4	5	4	4	4	5	5	5	3	5	4	5	5	3	4	4	5	5	3	5	4	4	5	5	4	5	3	3
409	2025/1/4 16:05:27	1	2	Physical Education	2	1	1	1	1	1	3	1	1	1	1	2	2	2	3	3	2	1	2	2	3	1	1	1	1	2	3	2	2	2	1	1	2	2
410	2025/1/4 16:05:29	1	2	Physical Education	1	5	4	4	5	5	5	4	5	5	5	4	5	4	4	5	4	4	4	4	4	4	4	5	3	5	5	5	4	4	5	4	4	4
411	2025/1/4 16:05:29	2	2	Sports Training	1	3	4	5	5	4	3	5	4	4	5	5	4	4	4	3	4	3	4	4	4	5	4	4	4	3	3	5	5	4	3	3	5	3
412	2025/1/4 16:05:44	1	2	Physical Education	2	3	1	1	1	1	2	2	2	1	2	1	2	2	3	3	2	2	2	3	2	1	2	1	1	2	2	2	2	3	1	2	1	2
413	2025/1/4 16:05:45	2	2	Physical Education	1	3	5	4	4	4	3	5	5	5	4	3	5	5	5	4	3	4	4	5	4	3	5	5	5	3	3	5	5	4	5	5	5	5
414	2025/1/4 16:06:01	2	1	Physical Education	2	2	1	1	2	1	1	1	2	2	2	2	1	1	2	2	2	2	2	1	2	3	2	1	1	2	2	1	1	2	1	3	3	2
415	2025/1/4 16:06:03	1	1	Physical Education	1	4	5	4	4	3	5	4	5	5	5	3	4	3	5	4	5	5	5	4	3	4	4	4	3	5	4	4	5	4	4	4	4	5
416	2025/1/4 16:06:06	1	1	Sports Training	1	5	5	5	5	5	4	3	4	4	3	1	5	5	5	5	4	5	5	4	4	5	5	3	4	4	4	4	5	4	3	5	5	5
417	2025/1/4 16:06:19	1	1	Physical Education	2	1	2	1	3	2	3	1	1	1	2	2	3	2	2	1	2	2	2	1	3	1	1	2	1	1	2	1	2	2	3	1	2	1
418	2025/1/4 16:06:19	2	1	Physical Education	1	3	5	5	4	3	4	3	5	4	3	5	4	3	5	5	3	4	5	5	4	3	4	4	5	4	4	4	5	5	4	4	5	4
419	2025/1/4 16:06:34	2	2	Sports Training	1	4	5	4	4	5	5	1	4	5	4	4	5	5	5	5	5	5	4	5	5	4	4	5	3	4	5	4	4	3	5	5	3	5
420	2025/1/4 16:06:37	1	2	Physical Education	1	5	4	5	4	3	5	5	4	5	4	4	5	4	4	3	4	5	4	5	4	5	5	4	3	4	3	5	5	5	5	5	3	5
421	2025/1/4 16:06:53	2	2	Physical Education	2	3	2	2	1	2	3	2	3	3	2	2	2	3	1	1	2	1	2	1	2	1	1	1	3	3	3	2	2	1	1	1	1	2
422	2025/1/4 16:06:54	1	2	Physical Education	1	4	5	5	5	4	5	4	5	3	4	3	3	5	4	5	3	4	5	5	5	5	3	3	5	5	4	5	4	4	5	5	5	5
423	2025/1/4 16:07:10	1	1	Physical Education	2	2	2	2	3	2	3	1	2	2	2	2	1	2	1	1	2	1	2	2	1	2	2	2	1	1	2	3	1	2	1	3	2	2
424	2025/1/4 16:07:11	2	2	Sports Training	1	5	4	5	5	3	3	4	5	5	5	5	4	4	5	4	3	4	5	3	5	4	4	5	4	5	4	4	5	5	5	5	3	4
425	2025/1/4 16:07:11	1	2	Physical Education	1	5	5	5	4	4	4	5	4	5	3	4	4	5	4	4	5	4	4	4	5	5	5	4	4	5	4	4	5	4	4	5	5	3
426	2025/1/4 16:07:28	1	1	Sports Training	1	3	3	3	5	4	3	5	3	3	4	4	4	4	5	5	4	4	4	4	4	4	4	4	5	4	5	5	4	5	3	3	4	5
427	2025/1/4 16:07:28	1	2	Physical Education	1	5	4	5	4	4	4	5	4	3	4	4	4	5	4	5	4	5	3	5	3	4	4	5	3	3	4	4	4	4	3	5	4	4
428	2025/1/4 16:07:44	2	1	Sports Training	1	5	4	5	4	4	5	4	3	5	4	4	5	4	5	5	4	4	3	4	5	4	5	4	3	4	4	3	5	3	4	5	4	5
429	2025/1/4 16:08:00	2	2	Sports Training	1	3	5	5	5	5	4	4	4	4	4	4	4	5	4	5	5	3	5	4	4	4	5	4	5	4	5	4	1	3	5	5	4	5
430	2025/1/4 16:08:00	2	1	Physical Education	2	1	2	1	1	1	2	3	1	3	2	2	1	3	1	1	2	3	3	1	2	1	1	3	2	2	2	3	1	1	1	1	3	3
431	2025/1/4 16:08:00	2	1	Physical Education	1	4	4	5	4	4	5	5	4	5	3	5	5	4	4	5	4	3	4	3	4	5	5	5	5	3	4	4	3	4	5	4	5	5
432	2025/1/4 16:08:17	2	1	Sports Training	1	5	5	4	4	5	5	5	5	5	4	3	5	5	5	5	4	5	4	4	5	3	4	5	3	4	4	4	4	3	5	4	3	5
433	2025/1/4 16:08:18	1	2	Physical Education	2	2	2	3	3	3	3	2	2	1	3	1	1	1	1	3	2	3	1	1	2	2	3	2	3	3	1	3	1	2	1	2	2	3
434	2025/1/4 16:08:34	1	2	Physical Education	1	5	5	4	3	5	4	5	3	4	4	5	4	5	5	4	4	4	5	4	4	3	4	5	4	5	3	5	5	4	3	5	3	3
435	2025/1/4 16:08:34	1	2	Sports Training	1	4	5	5	4	5	5	5	4	4	4	3	3	3	3	4	5	5	5	3	3	3	5	4	4	4	4	5	5	4	3	4	4	5
436	2025/1/4 16:08:41	2	1	Physical Education	2	2	1	1	1	3	3	2	2	2	2	1	1	2	3	1	2	3	1	2	3	3	1	3	1	1	1	1	1	2	1	2	3	2
437	2025/1/4 16:08:51	1	1	Sports Training	1	4	3	5	5	5	3	5	4	4	3	5	5	3	3	4	4	5	5	4	3	4	5	4	4	5	3	1	5	5	4	5	5	5
438	2025/1/4 16:08:52	2	2	Physical Education	1	5	5	5	4	4	3	1	4	4	4	5	5	4	4	4	4	5	4	5	5	5	4	5	5	3	4	3	5	5	3	5	4	3
439	2025/1/4 16:09:07	2	1	Sports Training	1	4	4	5	5	3	4	5	5	3	3	3	3	5	5	4	5	5	5	5	5	4	3	5	3	5	4	5	3	3	3	4	5	5
440	2025/1/4 16:09:07	1	1	Physical Education	2	1	2	1	1	1	1	1	2	1	1	2	1	2	3	1	2	2	1	2	1	3	3	2	2	1	1	1	1	1	2	2	2	1
441	2025/1/4 16:09:24	2	2	Sports Training	1	4	4	4	5	4	5	3	5	5	4	4	5	5	4	5	4	3	4	4	4	5	3	5	4	4	5	3	5	4	4	5	4	5
442	2025/1/4 16:09:25	1	2	Physical Education	2	3	2	3	2	1	3	3	2	3	2	2	2	2	2	2	2	2	2	1	3	1	2	1	2	1	2	2	2	2	1	2	1	2
443	2025/1/4 16:09:44	2	2	Physical Education	2	2	2	1	2	1	1	1	3	1	2	3	2	2	2	3	2	2	2	1	2	1	2	3	1	2	2	3	1	1	3	2	1	1
444	2025/1/4 16:09:46	1	1	Physical Education	1	3	4	5	3	5	4	5	4	4	4	3	4	4	5	5	4	4	4	5	5	5	4	5	4	3	5	3	5	4	4	4	3	5
445	2025/1/4 16:09:58	2	1	Sports Training	1	5	4	4	4	3	3	5	4	3	5	5	4	5	4	4	3	4	4	5	4	5	4	5	4	5	4	4	4	5	5	4	5	4
446	2025/1/4 16:10:14	2	2	Physical Education	2	1	1	1	2	2	2	3	2	2	1	1	2	2	1	1	2	2	2	3	2	2	1	2	1	1	2	2	3	2	1	3	2	1
447	2025/1/4 16:10:14	1	1	Physical Education	1	3	4	3	3	5	5	3	4	3	5	5	4	3	4	5	4	5	5	5	4	4	3	5	3	3	5	5	5	5	5	5	5	5
448	2025/1/4 16:10:14	2	1	Sports Training	1	4	5	4	5	4	4	5	5	5	4	4	4	5	4	4	4	5	4	4	5	5	4	5	4	3	4	4	4	3	3	3	4	5
449	2025/1/4 16:10:31	1	1	Sports Training	1	5	4	4	3	4	3	5	3	3	3	5	3	4	4	4	3	5	3	5	3	4	5	4	5	4	5	5	4	4	5	5	3	5
450	2025/1/4 16:10:32	1	1	Physical Education	2	1	1	3	3	2	2	1	2	2	2	3	1	2	2	3	1	1	1	3	2	3	2	1	3	3	3	1	1	2	1	1	2	3
451	2025/1/4 16:10:33	2	1	Physical Education	1	5	3	5	5	5	3	3	4	3	4	3	4	5	5	5	4	4	4	3	5	5	3	3	5	4	4	4	5	5	5	4	5	3
452	2025/1/4 16:10:49	2	1	Physical Education	1	5	4	1	5	5	5	5	5	4	4	4	4	4	4	4	4	3	4	4	5	4	4	5	5	4	4	4	3	4	4	5	4	5
453	2025/1/4 16:10:49	2	1	Sports Training	1	5	4	4	3	4	5	4	5	3	4	4	4	3	5	5	4	5	3	5	5	4	4	4	4	4	5	4	4	4	4	5	4	5
454	2025/1/4 16:10:50	2	1	Physical Education	2	2	1	2	3	2	1	1	2	2	1	2	1	2	2	1	2	3	2	2	1	1	3	2	1	1	1	1	1	1	1	2	1	2
455	2025/1/4 16:11:07	1	2	Physical Education	1	5	5	4	5	3	3	3	1	5	4	5	5	4	5	4	4	5	4	4	5	3	4	4	4	4	5	5	4	5	4	3	5	5
456	2025/1/4 16:11:26	1	1	Physical Education	1	4	4	4	5	5	5	5	4	4	4	4	5	5	3	5	4	5	5	4	4	5	3	4	4	5	4	4	4	3	5	4	5	4
457	2025/1/4 16:11:27	1	1	Physical Education	2	2	2	2	2	3	3	2	2	1	3	1	3	1	2	1	1	1	2	2	3	2	2	2	1	2	3	3	3	2	3	3	3	2
458	2025/1/4 16:11:42	1	2	Physical Education	1	4	4	4	5	5	3	4	4	5	3	3	4	5	5	4	5	3	4	3	3	5	5	4	5	5	4	4	4	5	3	4	5	4
459	2025/1/4 16:11:44	2	1	Physical Education	2	1	2	3	2	1	2	2	2	1	1	2	2	3	3	2	2	2	2	2	1	1	1	3	1	2	2	1	1	2	1	1	1	1
460	2025/1/4 16:11:59	1	2	Physical Education	1	5	5	3	3	3	5	4	3	5	4	5	5	5	4	5	4	3	4	4	5	5	5	4	5	5	4	4	5	4	3	5	4	5
461	2025/1/4 16:12:00	1	1	Sports Training	1	4	5	5	4	5	4	5	5	3	5	4	4	5	5	5	4	5	4	5	4	4	4	5	3	4	5	4	5	4	3	3	5	5
462	2025/1/4 16:12:16	1	1	Sports Training	1	5	5	5	4	5	5	5	5	5	4	5	5	4	3	5	4	5	5	5	5	4	3	5	5	4	4	5	5	5	4	5	5	4
463	2025/1/4 16:12:18	2	1	Physical Education	2	1	3	1	1	3	1	3	1	2	1	2	1	3	1	1	2	2	1	1	3	1	2	3	2	2	3	3	3	1	1	2	1	3
464	2025/1/4 16:12:19	2	1	Physical Education	1	5	5	3	4	5	5	3	5	4	5	5	5	4	4	5	4	5	4	3	4	4	3	5	4	4	4	5	5	4	5	4	4	5
465	2025/1/4 16:12:34	1	2	Sports Training	1	3	5	5	4	4	5	4	5	5	3	3	4	4	4	4	4	5	4	5	3	5	5	4	5	5	5	4	4	3	4	4	4	3
466	2025/1/4 16:12:35	1	1	Physical Education	1	4	3	5	4	5	5	5	5	5	4	5	5	3	4	4	3	4	5	5	3	5	5	4	4	4	4	4	5	4	5	5	3	5
467	2025/1/4 16:12:36	2	2	Physical Education	2	1	3	2	1	1	3	1	2	3	1	1	2	1	2	2	2	1	2	2	1	2	3	1	1	1	2	1	1	1	1	1	1	1
468	2025/1/4 16:12:51	1	1	Physical Education	2	1	2	1	2	1	2	1	2	1	1	3	1	1	1	1	1	3	2	1	3	2	1	2	2	3	2	2	1	3	1	1	3	2
469	2025/1/4 16:12:53	1	1	Sports Training	1	5	3	5	4	5	4	3	5	5	3	3	4	4	5	4	4	5	4	4	4	3	4	4	3	5	4	5	5	5	3	5	5	4
470	2025/1/4 16:13:08	1	2	Physical Education	2	1	1	1	1	2	2	2	2	1	3	3	3	1	2	1	1	1	2	1	1	3	2	2	3	2	2	3	1	2	2	3	1	2
471	2025/1/4 16:13:10	2	1	Physical Education	1	5	4	3	3	4	4	5	4	5	4	4	4	5	4	4	5	4	4	3	5	4	4	4	5	5	5	3	3	5	5	4	1	4
472	2025/1/4 16:13:11	1	2	Sports Training	1	5	3	5	4	5	4	5	4	3	5	4	5	5	4	5	4	5	3	4	4	4	4	4	5	4	5	4	5	4	3	4	3	3
473	2025/1/4 16:13:25	1	1	Sports Training	1	5	4	5	5	5	5	5	4	5	5	5	5	5	4	5	4	5	5	4	5	5	5	5	3	4	3	5	4	4	5	5	4	5
474	2025/1/4 16:13:27	2	1	Physical Education	1	5	4	5	5	5	3	5	4	5	3	5	5	4	5	4	4	4	1	5	5	4	4	4	3	5	5	3	3	4	4	5	3	5
475	2025/1/4 16:13:41	2	1	Physical Education	2	1	2	1	3	1	2	2	2	1	2	2	2	2	1	1	2	1	1	2	2	2	1	1	3	2	2	2	3	2	1	2	1	2
476	2025/1/4 16:13:42	2	1	Sports Training	1	5	4	5	4	4	5	5	5	5	4	4	4	5	3	4	5	3	5	5	4	5	4	5	3	5	3	3	3	4	1	5	4	4
477	2025/1/4 16:13:47	1	2	Physical Education	1	3	5	4	4	3	5	5	4	4	5	5	3	5	5	5	4	5	5	4	5	4	5	5	5	5	3	4	4	5	5	5	4	3
478	2025/1/4 16:14:00	1	2	Physical Education	2	1	2	3	3	1	1	1	1	1	1	1	2	2	1	2	2	3	1	1	2	2	1	2	1	2	1	3	1	2	3	1	2	1
479	2025/1/4 16:14:03	2	1	Physical Education	1	5	4	4	5	5	5	3	4	5	5	4	5	4	4	4	3	5	5	4	3	4	4	5	4	4	4	4	5	5	5	5	4	5
480	2025/1/4 16:14:17	1	1	Physical Education	2	2	1	1	1	2	1	1	1	1	2	1	3	1	2	1	2	1	3	3	2	2	1	2	1	3	2	1	3	2	1	2	1	2
481	2025/1/4 16:14:17	1	2	Sports Training	1	5	4	4	4	5	5	4	4	4	4	4	4	4	5	4	3	5	3	3	5	4	5	5	4	5	4	5	5	5	5	4	5	3
482	2025/1/4 16:14:19	1	1	Physical Education	1	5	5	3	5	5	5	4	3	5	4	4	4	4	4	4	3	4	3	5	4	5	4	4	4	4	4	5	5	4	3	4	4	5
483	2025/1/4 16:14:35	1	2	Sports Training	1	4	5	5	3	4	5	5	4	4	5	3	4	5	3	4	4	5	4	5	5	5	4	4	5	4	4	4	4	4	3	5	4	4
484	2025/1/4 16:14:36	2	2	Physical Education	1	5	5	5	5	4	5	4	5	4	4	5	4	4	4	3	3	1	4	5	4	5	4	4	5	4	5	4	5	4	4	4	4	4
485	2025/1/4 16:14:41	1	1	Physical Education	2	2	3	1	1	3	1	2	3	1	1	1	1	1	3	1	1	3	3	2	2	3	1	1	3	2	2	3	1	2	1	1	2	1
486	2025/1/4 16:14:52	2	2	Sports Training	1	5	5	4	5	3	5	4	5	4	5	5	3	4	4	3	3	4	4	5	4	4	4	5	3	5	5	4	5	5	4	5	4	3
487	2025/1/4 16:14:53	2	2	Physical Education	1	5	4	4	3	4	5	5	4	4	5	4	4	4	5	4	3	4	4	4	4	5	4	4	4	4	4	5	3	3	4	5	5	5
488	2025/1/4 16:15:09	1	2	Sports Training	1	5	4	3	5	5	3	5	5	3	3	5	5	4	3	5	5	5	5	4	4	4	4	4	4	4	3	3	3	4	5	3	4	5
489	2025/1/4 16:15:10	2	1	Physical Education	1	4	4	4	4	4	5	3	5	5	3	4	5	4	5	4	4	3	4	4	5	5	5	1	5	5	4	4	4	5	5	4	5	4
490	2025/1/4 16:15:26	2	2	Physical Education	1	4	4	4	5	4	5	5	4	4	5	4	3	4	4	4	4	3	4	5	4	4	4	4	5	5	4	5	5	4	5	5	5	4
491	2025/1/4 16:15:26	2	1	Sports Training	1	5	4	4	3	4	5	5	4	4	5	4	4	4	4	5	4	3	3	5	4	5	4	5	3	4	4	4	5	3	3	4	5	5
492	2025/1/4 16:15:28	1	1	Physical Education	2	1	2	1	3	2	3	2	2	1	2	1	1	2	3	1	2	1	2	2	2	1	3	1	2	2	2	2	1	1	3	2	2	3
493	2025/1/4 16:15:42	2	2	Physical Education	2	3	2	2	2	1	3	1	2	2	1	3	3	2	1	2	2	1	2	2	2	2	2	1	1	2	1	1	3	2	1	2	1	3
494	2025/1/4 16:15:43	1	1	Sports Training	1	3	5	5	4	5	4	4	5	5	5	4	4	3	4	5	4	4	5	3	5	4	5	5	4	5	4	4	4	4	4	4	4	4
495	2025/1/4 16:16:00	1	2	Physical Education	1	4	4	1	5	4	5	5	5	3	4	3	5	4	3	3	4	5	5	5	4	5	5	4	5	5	5	4	5	4	5	5	5	4
496	2025/1/4 16:16:00	2	1	Sports Training	1	5	4	4	4	3	5	5	5	4	3	4	4	4	4	4	3	5	4	4	5	4	4	5	3	3	4	5	5	3	3	4	4	5
497	2025/1/4 16:16:00	1	1	Physical Education	2	1	1	3	2	3	3	1	2	1	1	3	1	1	2	1	1	2	2	1	1	2	1	2	2	2	1	1	1	2	1	2	2	1
498	2025/1/4 16:16:14	1	2	Physical Education	1	5	5	5	4	5	5	5	5	5	4	4	5	5	4	5	3	5	4	4	3	4	5	4	3	5	4	4	4	4	4	5	4	5
499	2025/1/4 16:16:14	1	1	Sports Training	1	4	4	3	4	4	4	5	4	5	4	5	5	4	4	3	5	3	4	4	4	3	4	5	5	1	4	4	5	4	5	5	3	1
500	2025/1/4 16:16:31	2	2	Physical Education	1	5	5	3	4	3	5	4	3	3	5	4	4	5	5	5	4	4	4	3	4	5	5	4	4	4	4	4	5	4	3	3	4	5
501	2025/1/4 16:16:47	1	1	Physical Education	1	5	4	5	3	3	5	5	3	4	5	5	3	3	4	3	5	4	4	3	4	5	5	5	4	5	5	3	5	5	3	5	4	3
502	2025/1/4 16:17:03	2	1	Sports Training	1	5	4	5	5	5	4	5	4	4	5	4	5	1	5	4	4	5	5	4	4	5	4	3	5	5	4	3	5	4	5	5	3	3
503	2025/1/4 16:17:03	2	2	Physical Education	1	4	5	5	5	4	3	5	5	5	4	4	3	5	5	5	3	4	5	5	4	3	4	4	4	5	4	3	3	4	3	4	5	5
504	2025/1/4 16:17:16	2	1	Sports Training	1	5	4	4	5	4	4	5	4	5	5	5	5	4	5	4	4	4	4	4	4	4	5	4	3	4	3	5	5	4	5	4	4	3
505	2025/1/4 16:17:16	1	2	Physical Education	1	5	4	5	3	5	4	5	4	5	3	4	5	4	5	5	5	5	4	4	4	4	4	5	5	4	4	4	5	5	4	4	5	4
506	2025/1/4 16:17:33	2	2	Physical Education	1	4	4	5	5	3	5	4	4	4	5	4	4	3	5	4	5	3	5	4	5	5	5	4	5	5	4	4	5	5	4	4	5	5
507	2025/1/4 16:17:37	2	1	Sports Training	1	4	4	3	4	3	3	5	3	5	4	5	4	5	5	4	4	5	4	5	5	3	5	4	5	5	4	5	4	4	5	4	4	3
508	2025/1/4 16:17:50	1	1	Sports Training	1	3	4	5	5	3	4	5	3	4	4	3	3	4	4	4	4	5	3	5	5	4	4	5	4	4	4	5	5	4	4	5	5	3
509	2025/1/4 16:18:06	1	1	Physical Education	2	2	2	1	2	1	1	1	2	1	2	1	2	2	1	1	2	2	2	1	2	1	1	1	2	1	2	3	1	2	2	2	1	3
510	2025/1/4 16:18:08	1	2	Sports Training	1	4	5	3	5	5	5	5	5	4	4	4	4	1	4	1	4	4	4	4	4	4	4	4	4	5	5	3	4	4	5	3	4	5
511	2025/1/4 16:18:22	1	1	Physical Education	1	4	4	5	5	5	4	1	5	5	3	3	4	4	3	5	4	5	4	3	5	4	5	5	5	3	5	5	4	4	5	4	3	5
512	2025/1/4 16:18:22	2	2	Physical Education	2	1	2	1	1	1	1	2	2	1	2	3	3	2	1	1	1	2	2	1	2	2	1	3	1	2	2	1	3	3	2	1	1	3
513	2025/1/4 16:18:25	2	1	Sports Training	1	3	5	5	3	5	3	3	4	5	4	5	5	4	5	4	4	4	4	1	4	4	5	5	4	4	4	4	4	5	4	4	4	5
514	2025/1/4 16:18:39	1	1	Physical Education	2	1	2	1	2	1	1	2	1	1	1	2	1	1	1	3	2	3	2	1	2	1	2	2	3	3	2	1	2	2	1	1	1	3
515	2025/1/4 16:18:40	2	1	Sports Training	1	3	4	3	4	1	4	4	4	5	5	3	5	4	4	5	4	5	3	4	3	4	4	4	5	5	4	4	5	5	5	5	5	5
516	2025/1/4 16:18:44	2	1	Physical Education	1	4	4	5	4	5	5	5	4	3	3	4	4	5	4	5	3	4	4	4	5	5	5	5	4	4	4	5	5	5	5	5	5	4
517	2025/1/4 16:18:56	2	1	Sports Training	1	3	5	5	4	4	5	5	4	5	4	5	4	5	4	4	5	5	4	4	4	4	4	4	3	5	4	5	5	4	5	5	4	5
518	2025/1/4 16:18:57	1	1	Physical Education	2	1	1	1	1	1	1	1	2	1	2	2	1	2	1	2	1	2	2	3	1	1	2	3	3	1	2	1	1	2	2	3	1	1
519	2025/1/4 16:19:13	2	1	Physical Education	1	5	5	5	4	5	3	5	4	3	4	3	4	5	3	3	5	5	4	5	4	3	5	4	5	5	3	4	4	5	3	3	3	5
520	2025/1/4 16:19:13	1	2	Sports Training	1	5	5	5	5	5	4	3	4	4	5	4	4	5	3	4	4	5	4	4	4	4	5	5	3	4	5	5	5	4	5	4	5	3
521	2025/1/4 16:19:29	2	2	Physical Education	1	4	3	5	3	1	4	5	5	3	3	4	5	5	4	4	5	5	4	5	4	5	4	4	4	4	4	3	5	3	5	4	4	4
522	2025/1/4 16:19:30	1	2	Sports Training	1	4	5	4	4	5	4	5	3	5	4	5	4	5	3	5	5	4	4	5	1	5	4	5	5	4	5	5	4	5	3	5	4	5
523	2025/1/4 16:19:47	2	1	Sports Training	1	5	5	5	4	5	5	4	5	3	4	4	5	5	5	5	1	4	3	4	3	4	3	5	4	4	4	5	5	5	5	5	5	5
524	2025/1/4 16:19:48	1	2	Physical Education	1	3	4	5	4	3	5	3	5	5	3	4	5	4	5	4	3	4	4	5	4	3	5	4	3	4	5	3	5	4	4	4	5	3
525	2025/1/4 16:20:05	1	1	Sports Training	1	5	5	4	4	5	3	4	4	5	3	3	5	4	5	5	4	5	5	5	5	5	3	5	3	4	3	4	5	5	5	4	4	3
526	2025/1/4 16:20:21	2	2	Sports Training	1	5	4	5	4	4	5	4	4	5	4	5	3	4	5	4	5	5	4	4	5	4	5	5	5	5	4	5	5	4	5	5	5	5
527	2025/1/4 16:20:22	2	1	Physical Education	1	3	4	3	3	5	5	3	5	5	4	4	4	3	4	5	4	4	5	5	4	3	4	5	4	5	4	3	3	4	5	4	4	4
528	2025/1/4 16:20:36	1	2	Physical Education	2	1	3	1	3	3	2	1	2	3	3	1	2	2	2	1	2	2	1	1	2	3	1	1	2	3	1	1	2	1	3	1	1	1
529	2025/1/4 16:20:37	1	1	Sports Training	1	4	4	5	5	4	5	5	4	4	4	5	5	5	3	3	3	4	4	4	4	4	5	3	5	4	3	3	5	5	5	3	5	1
530	2025/1/4 16:20:39	2	2	Physical Education	1	5	5	5	4	5	4	4	3	5	5	4	5	4	4	5	4	3	4	5	4	5	4	5	4	5	4	5	3	5	5	5	5	5
531	2025/1/4 16:21:11	1	2	Sports Training	1	3	4	4	3	3	5	4	4	5	3	4	4	3	3	4	5	4	4	4	4	4	5	4	4	5	5	3	5	4	4	5	4	3
532	2025/1/4 16:21:11	1	2	Physical Education	2	2	1	1	2	1	2	1	2	1	1	1	1	2	2	1	2	1	2	1	1	1	2	1	3	3	2	2	1	1	1	2	1	2
533	2025/1/4 16:21:12	1	2	Physical Education	1	5	4	4	5	5	5	3	4	5	5	5	4	5	5	4	4	5	4	5	4	4	4	3	4	3	3	4	5	5	5	5	4	4
534	2025/1/4 16:21:27	2	2	Sports Training	1	4	5	4	5	4	1	5	4	3	5	5	4	5	5	5	4	3	5	3	5	5	4	4	4	4	3	3	3	5	3	5	3	4
535	2025/1/4 16:21:27	2	1	Physical Education	1	5	4	5	5	5	5	4	5	5	5	4	5	5	3	5	3	5	4	4	4	5	5	4	5	4	5	4	5	4	5	5	4	4
536	2025/1/4 16:21:28	2	2	Physical Education	2	3	2	1	1	1	1	1	2	1	1	2	1	3	2	2	2	1	2	1	3	1	2	1	3	1	2	1	3	2	1	3	3	3
537	2025/1/4 16:21:43	2	2	Physical Education	1	5	5	5	5	5	4	4	5	4	5	4	4	4	5	4	5	5	3	5	5	3	4	5	4	4	4	5	5	5	3	3	4	5
538	2025/1/4 16:22:01	2	2	Physical Education	1	5	3	5	4	5	5	3	4	5	5	4	4	5	5	5	5	5	3	4	5	4	4	4	4	4	4	3	5	4	4	4	3	5
539	2025/1/4 16:22:02	2	2	Physical Education	2	2	1	1	2	3	1	2	1	3	3	1	2	1	1	2	2	1	1	2	1	3	1	3	2	2	1	2	3	1	1	1	3	1
540	2025/1/4 16:22:33	1	1	Physical Education	1	5	4	5	5	5	5	3	5	4	4	4	5	3	5	3	4	3	4	5	3	5	4	4	3	1	4	5	3	4	4	4	4	3
541	2025/1/4 16:22:35	2	1	Sports Training	1	4	5	3	3	5	3	3	4	3	5	3	4	4	4	5	4	5	3	4	3	3	4	3	4	5	4	5	5	4	3	5	5	5
542	2025/1/4 16:22:50	1	2	Physical Education	1	3	3	1	4	5	5	5	4	5	3	5	5	5	5	5	4	5	4	4	3	5	5	4	3	5	4	5	4	5	5	5	3	5
543	2025/1/4 16:22:53	2	2	Physical Education	2	1	1	3	2	2	1	2	2	1	1	2	2	1	1	1	1	2	1	1	3	1	1	2	2	2	2	1	1	2	2	1	2	3
544	2025/1/4 16:23:08	1	2	Physical Education	2	2	1	1	3	1	1	1	1	1	1	1	1	1	1	2	2	2	2	1	2	2	1	2	1	2	1	2	1	3	2	3	2	2
545	2025/1/4 16:23:10	2	1	Physical Education	1	5	5	4	4	5	4	4	4	4	4	5	4	5	4	5	4	3	3	4	5	5	4	4	3	5	4	3	3	4	1	5	4	5
546	2025/1/4 16:23:11	2	2	Sports Training	1	5	4	5	4	4	5	5	5	5	5	5	5	4	4	5	4	5	5	5	4	4	4	5	4	5	5	5	4	5	5	5	4	5
547	2025/1/4 16:23:26	1	2	Physical Education	2	3	2	2	1	1	1	2	3	2	1	2	2	1	1	2	2	2	1	1	2	3	1	1	2	2	1	2	1	2	2	3	1	3
548	2025/1/4 16:23:27	1	2	Physical Education	1	5	5	5	3	5	5	3	4	5	3	4	3	5	5	4	5	5	5	4	5	4	5	5	4	4	4	4	5	4	5	5	4	4
549	2025/1/4 16:23:29	1	2	Sports Training	1	4	4	4	5	4	4	4	4	4	5	5	4	4	4	5	3	4	4	4	4	5	5	5	3	5	5	4	1	4	5	3	5	3
550	2025/1/4 16:23:45	2	2	Sports Training	1	5	4	5	4	5	4	5	5	5	4	4	5	4	5	5	4	3	4	4	5	4	5	4	3	4	4	4	5	4	3	5	5	3
551	2025/1/4 16:24:01	1	1	Physical Education	1	5	4	5	5	4	4	5	5	4	5	5	4	4	5	4	4	4	4	5	5	4	4	3	5	5	4	4	4	4	3	4	5	5
552	2025/1/4 16:24:06	2	1	Sports Training	1	3	5	4	5	4	5	4	5	3	4	3	4	3	3	4	4	3	3	5	5	5	5	4	5	3	4	5	5	4	5	4	4	5
553	2025/1/4 16:24:16	2	1	Physical Education	1	5	5	4	5	3	4	1	4	5	4	5	5	5	5	5	3	5	4	1	4	3	4	3	3	4	5	3	4	5	5	4	5	4
554	2025/1/4 16:24:32	2	1	Sports Training	1	5	5	4	5	3	4	4	4	4	3	3	4	4	3	5	4	3	5	4	4	4	5	5	3	5	4	4	3	5	4	3	1	5
555	2025/1/4 16:24:33	1	2	Physical Education	1	3	4	4	3	4	4	5	4	5	4	4	5	5	5	4	3	5	3	5	5	3	4	4	4	5	4	5	5	3	4	5	3	3
556	2025/1/4 16:24:49	1	1	Sports Training	1	5	5	5	5	4	5	5	4	3	5	5	4	5	5	4	4	3	4	5	4	3	3	4	3	4	4	3	5	3	5	4	5	5
557	2025/1/4 16:24:50	1	2	Physical Education	1	4	5	4	4	5	5	4	5	5	5	4	3	5	5	3	5	5	5	5	5	3	4	3	4	5	4	3	5	4	5	5	1	4
558	2025/1/4 16:25:05	2	1	Sports Training	1	5	5	4	3	4	5	5	4	4	5	4	5	4	5	4	4	3	4	5	3	4	5	5	4	5	4	4	5	5	3	3	5	3
559	2025/1/4 16:25:05	1	1	Physical Education	1	5	4	5	5	4	5	4	4	5	4	5	5	4	4	4	3	5	5	5	5	5	4	4	5	5	4	3	4	4	5	4	4	5
560	2025/1/4 16:25:21	1	1	Physical Education	1	5	4	5	5	5	3	5	4	5	5	4	4	5	4	5	4	5	5	3	5	3	3	5	5	3	4	3	3	4	5	3	3	5
561	2025/1/4 16:25:24	2	2	Sports Training	1	3	5	4	3	4	5	5	4	5	5	3	5	4	4	4	4	1	4	5	3	5	4	5	4	3	4	4	5	5	5	4	5	5
562	2025/1/4 16:25:38	1	1	Physical Education	1	5	5	4	4	4	5	5	5	4	4	3	5	5	3	4	4	5	5	5	5	4	5	5	5	5	5	5	5	4	3	5	4	4
563	2025/1/4 16:25:39	2	2	Sports Training	1	3	5	5	3	5	5	5	4	5	4	4	5	4	3	4	5	5	5	5	3	5	3	5	4	5	5	3	4	4	3	5	4	5
564	2025/1/4 16:25:55	1	2	Sports Training	1	5	5	4	3	4	4	3	5	1	4	5	5	4	3	5	3	5	4	3	4	4	3	5	5	4	5	4	5	5	3	3	4	3
565	2025/1/4 16:26:10	2	1	Physical Education	1	5	4	5	5	5	5	4	5	3	4	5	4	4	3	4	4	5	4	5	3	3	3	4	5	5	4	3	5	4	4	3	3	4
566	2025/1/4 16:26:11	2	2	Sports Training	1	5	4	5	5	4	5	4	4	5	5	3	5	4	5	5	5	3	4	5	5	5	5	4	5	4	5	5	4	4	5	4	4	5
567	2025/1/4 16:26:27	2	2	Sports Training	1	5	1	3	5	4	5	3	4	5	4	4	4	4	5	3	5	3	4	3	4	5	4	4	3	5	1	5	4	4	3	5	4	5
568	2025/1/4 16:26:41	2	1	Physical Education	1	5	1	4	3	5	5	4	5	3	5	5	5	5	4	3	5	4	5	5	5	4	5	5	5	4	4	5	4	5	5	4	5	5
569	2025/1/4 16:26:43	2	2	Sports Training	1	4	4	4	4	4	4	4	4	3	4	5	4	4	5	3	4	5	4	4	4	5	5	4	4	4	5	5	5	5	5	5	4	4
570	2025/1/4 16:26:58	2	1	Physical Education	1	5	4	5	4	4	4	5	5	4	3	5	5	4	4	5	4	5	3	3	4	4	5	3	4	5	4	4	4	5	4	5	3	4
571	2025/1/4 16:26:59	1	2	Sports Training	1	5	4	4	3	5	5	5	3	3	3	4	4	5	3	5	4	3	5	4	4	5	5	4	4	4	4	4	4	4	5	4	5	3
572	2025/1/4 16:27:15	2	1	Physical Education	1	5	4	4	3	3	5	4	5	5	4	3	4	4	5	5	3	4	3	5	3	5	4	4	5	4	5	5	3	5	4	5	3	4
573	2025/1/4 16:27:16	2	2	Sports Training	1	4	4	4	4	4	4	5	4	4	4	4	5	5	4	3	4	5	5	4	3	5	4	3	4	4	4	4	5	4	4	5	4	5
574	2025/1/4 16:27:30	2	1	Physical Education	1	3	4	3	5	4	3	5	4	5	5	4	4	3	3	4	4	4	5	3	5	4	5	4	5	4	5	4	4	5	5	4	4	5
575	2025/1/4 16:27:47	1	2	Sports Training	1	5	5	4	5	4	5	3	5	3	5	4	5	3	3	3	4	4	4	5	4	4	4	3	4	4	5	5	5	4	5	3	4	4
576	2025/1/4 16:28:03	2	1	Sports Training	1	4	4	5	5	3	3	5	4	5	3	5	5	3	5	5	1	4	5	4	5	5	4	5	5	3	4	4	5	5	4	4	5	5
577	2025/1/4 16:28:04	2	2	Physical Education	1	5	5	4	5	5	4	3	4	3	4	5	5	4	5	5	5	5	5	3	5	5	5	5	4	3	4	4	3	4	4	3	4	3
578	2025/1/4 16:28:13	2	2	Physical Education	1	3	4	3	5	4	5	4	1	5	5	5	4	5	3	5	5	3	5	5	4	5	5	4	5	3	3	4	4	5	4	5	3	3
579	2025/1/4 16:28:13	1	1	Sports Training	1	5	3	4	3	5	5	5	3	4	4	5	4	4	3	5	3	5	4	4	4	5	5	5	5	4	4	4	4	3	3	5	5	5
580	2025/1/4 16:28:34	1	2	Physical Education	1	3	4	4	4	4	5	4	5	5	3	4	4	4	3	5	4	4	3	4	4	4	4	4	5	3	4	3	3	5	3	5	4	5
581	2025/1/4 16:28:34	2	2	Sports Training	1	5	3	5	5	5	5	5	4	5	4	4	5	4	5	5	5	4	4	5	4	4	5	4	3	4	5	4	5	3	4	5	4	3
582	2025/1/4 16:28:51	1	1	Sports Training	1	5	4	5	5	5	5	4	4	5	5	4	4	3	4	4	5	4	4	5	5	4	5	5	5	4	3	3	5	5	4	4	5	3
583	2025/1/4 16:28:52	2	2	Physical Education	1	5	4	4	3	3	4	3	4	3	4	4	3	4	5	5	4	5	4	4	5	4	4	4	4	3	5	5	3	3	4	4	4	5
584	2025/1/4 16:29:07	1	2	Physical Education	1	3	4	4	4	5	3	5	5	3	4	4	1	5	5	4	4	5	4	4	3	5	5	3	4	5	3	4	5	4	3	4	5	4
585	2025/1/4 16:29:17	1	2	Sports Training	1	5	4	3	5	5	4	4	5	4	5	3	4	4	5	4	4	5	4	3	4	4	4	5	5	5	4	4	4	4	3	5	4	5
586	2025/1/4 16:29:33	1	2	Sports Training	1	3	4	4	4	5	3	3	5	3	4	4	5	4	4	5	5	5	4	4	5	4	4	4	3	3	4	4	3	4	5	4	4	4
587	2025/1/4 16:29:34	1	1	Physical Education	1	5	3	1	5	4	5	5	4	5	4	1	5	4	5	4	4	5	4	4	4	5	4	3	5	3	4	4	1	5	5	4	5	4
588	2025/1/4 16:29:50	1	2	Physical Education	1	5	4	5	5	5	4	4	5	5	4	3	5	4	5	3	5	4	4	4	1	3	5	3	4	5	4	5	3	3	3	5	5	4
589	2025/1/4 16:29:51	2	2	Sports Training	1	4	4	4	4	5	5	5	5	5	1	4	5	5	3	4	4	4	4	5	3	3	4	4	5	3	4	4	4	3	4	5	5	3
590	2025/1/4 16:30:06	2	1	Sports Training	1	4	5	5	4	3	4	4	4	3	5	4	5	4	4	4	4	5	5	4	4	4	4	4	3	5	5	4	3	5	5	5	5	4
591	2025/1/4 16:30:22	2	2	Physical Education	1	3	3	3	3	5	5	5	5	1	3	4	4	5	4	4	4	5	5	4	5	4	5	3	3	4	4	4	3	5	5	4	3	5
592	2025/1/4 16:30:23	2	2	Sports Training	1	5	5	5	5	4	5	5	5	4	5	5	4	4	4	3	4	5	5	3	4	4	5	4	3	4	5	4	5	4	4	4	4	5
593	2025/1/4 16:30:39	2	1	Sports Training	1	5	5	4	5	3	4	5	4	5	4	4	5	4	4	3	5	1	4	5	5	4	4	4	5	4	4	5	5	4	5	5	4	4
594	2025/1/4 16:30:39	1	2	Physical Education	1	3	5	5	4	5	3	5	4	5	4	5	4	4	5	5	4	5	4	4	1	1	5	5	4	5	5	3	5	4	5	4	4	4
595	2025/1/4 16:30:55	1	2	Physical Education	1	4	4	5	3	5	5	5	4	3	4	4	5	5	4	5	4	3	5	4	5	4	5	5	5	4	3	4	5	3	5	5	3	4
596	2025/1/4 16:30:55	2	1	Sports Training	1	5	4	5	4	5	5	4	5	3	3	3	4	5	5	5	4	3	5	3	4	5	4	5	4	4	5	5	5	4	5	5	5	1
597	2025/1/4 16:31:13	1	1	Sports Training	1	4	5	5	3	1	4	4	5	4	5	5	5	3	3	5	4	5	5	4	5	3	3	5	5	4	4	4	3	4	4	4	4	5
598	2025/1/4 16:31:13	1	1	Physical Education	1	5	4	3	5	5	5	4	5	5	4	4	4	3	4	4	4	4	5	5	5	5	5	5	4	3	4	4	5	4	4	4	5	3
599	2025/1/4 16:31:29	1	1	Physical Education	1	4	4	5	4	3	4	5	3	4	3	4	4	5	3	4	5	3	4	5	4	5	5	4	4	5	4	5	3	4	4	5	3	5
600	2025/1/4 16:31:45	2	1	Sports Training	1	4	4	3	3	5	4	5	5	3	4	5	4	4	3	4	5	4	3	4	4	5	4	5	5	4	5	5	5	4	4	3	5	5
601	2025/1/4 16:32:00	2	1	Physical Education	1	5	5	5	5	3	5	4	5	4	4	4	5	3	3	4	4	3	4	4	5	4	4	5	5	5	4	3	3	4	5	5	3	4
602	2025/1/4 16:32:17	2	1	Sports Training	1	5	5	4	5	3	5	3	4	4	5	3	5	4	4	4	5	3	5	5	5	4	5	3	4	5	4	5	4	5	4	5	5	5
603	2025/1/4 16:32:34	2	1	Sports Training	1	4	5	5	5	4	4	5	5	5	4	5	4	5	5	5	4	5	5	3	5	5	5	4	5	5	4	5	5	4	5	4	3	4
604	2025/1/4 16:32:51	1	2	Physical Education	1	5	5	5	5	3	4	4	5	5	4	5	4	5	5	5	4	5	1	4	4	4	3	3	5	5	4	5	3	4	5	5	3	5
605	2025/1/4 16:33:08	2	2	Physical Education	1	5	5	5	3	4	4	5	5	3	4	5	4	4	5	4	4	4	5	5	5	5	5	5	5	4	4	3	5	5	4	5	3	4
606	2025/1/4 16:33:23	1	1	Sports Training	1	5	5	3	4	5	5	4	3	5	3	3	5	5	4	4	4	5	4	5	4	3	3	4	5	4	4	5	5	5	3	5	5	5
607	2025/1/4 16:33:25	1	1	Physical Education	1	3	4	5	3	3	5	5	5	5	4	5	4	5	4	3	3	5	4	5	1	3	5	3	4	1	5	4	5	5	5	5	5	3
608	2025/1/4 16:33:41	2	1	Physical Education	1	5	5	4	4	5	4	3	4	5	4	5	4	3	5	3	4	3	4	3	5	4	3	4	3	5	4	3	4	5	3	5	4	4
609	2025/1/4 16:33:42	2	1	Sports Training	1	5	5	4	5	4	3	4	5	3	5	5	3	5	4	3	3	5	4	4	5	3	5	4	3	5	4	5	4	4	5	1	4	5
610	2025/1/4 16:34:00	2	2	Sports Training	1	5	4	1	5	3	5	4	5	5	5	5	5	5	5	3	4	5	4	4	4	3	5	4	3	5	4	3	5	4	4	3	4	4
611	2025/1/4 16:34:16	1	2	Sports Training	1	5	5	3	5	3	3	4	4	5	4	1	5	5	3	4	4	4	4	5	4	5	5	5	4	4	4	4	5	4	4	4	3	3
612	2025/1/4 16:34:24	1	2	Physical Education	1	5	4	5	3	3	4	5	4	4	5	5	5	5	3	5	4	5	4	4	4	3	4	5	4	5	4	4	5	5	4	5	5	5
613	2025/1/4 16:34:50	2	1	Physical Education	1	5	4	5	5	4	5	5	3	5	4	3	5	5	4	5	4	1	4	4	4	4	4	5	5	5	5	3	5	3	4	3	5	5
614	2025/1/4 16:35:09	2	2	Physical Education	1	5	5	5	3	3	3	5	4	5	5	5	4	4	5	1	5	5	3	4	4	5	3	4	4	5	3	4	4	4	4	4	5	5
615	2025/1/4 16:35:26	2	1	Sports Training	1	5	4	3	5	5	3	5	3	4	5	4	3	4	5	4	3	3	4	3	5	4	5	4	3	4	3	4	5	4	4	4	4	5
616	2025/1/4 16:35:43	1	1	Physical Education	1	5	4	5	5	4	3	4	4	3	4	4	4	4	5	5	3	5	4	3	4	4	3	4	5	4	4	3	5	4	5	5	5	3
617	2025/1/4 16:35:44	2	2	Sports Training	1	5	4	4	4	4	4	4	5	3	5	5	5	5	3	5	5	5	5	5	5	5	4	5	5	3	4	5	4	5	3	5	4	3
618	2025/1/4 16:36:00	1	2	Sports Training	1	5	5	4	5	4	4	4	4	4	5	4	4	4	4	5	5	4	5	3	4	4	4	5	5	5	5	5	5	5	4	4	4	5
619	2025/1/4 16:36:02	1	1	Physical Education	1	5	3	4	5	4	5	5	5	5	5	5	5	3	4	5	3	4	5	4	4	5	1	3	5	5	4	4	4	4	4	3	5	5
620	2025/1/4 16:36:17	2	1	Physical Education	1	5	3	5	5	3	5	4	4	5	4	4	4	5	5	4	4	3	4	5	3	4	5	3	4	5	4	4	5	5	3	4	4	4
621	2025/1/4 16:36:19	1	1	Sports Training	1	5	5	5	4	3	5	5	4	3	4	5	5	4	5	5	4	4	4	4	5	5	3	4	4	4	5	5	4	5	5	5	3	5
622	2025/1/4 16:36:35	1	2	Physical Education	1	5	5	4	5	5	5	5	5	5	5	5	5	4	5	5	4	4	4	5	5	3	3	5	3	5	4	5	5	5	5	5	5	4
623	2025/1/4 16:36:36	2	1	Sports Training	1	4	4	4	3	4	5	4	5	3	4	4	5	5	4	5	4	3	4	5	3	4	5	4	3	4	4	4	5	5	5	5	4	4
624	2025/1/4 16:36:53	2	1	Physical Education	1	5	5	4	4	5	5	5	4	5	4	4	4	3	4	3	3	5	5	5	4	4	5	3	5	5	5	4	3	3	5	5	4	4
625	2025/1/4 16:36:54	2	1	Sports Training	1	5	4	4	3	5	4	4	4	5	3	4	5	4	5	5	4	3	4	4	3	4	4	5	4	5	3	4	4	3	3	4	4	1
626	2025/1/4 16:37:12	2	1	Sports Training	1	3	5	4	3	5	5	4	3	3	4	5	5	5	4	5	4	5	5	4	5	5	4	4	4	5	3	4	5	5	5	5	5	5
627	2025/1/4 16:37:12	1	2	Physical Education	1	5	4	4	5	5	3	3	4	4	5	4	4	5	4	5	4	4	5	5	5	4	4	5	4	5	4	3	5	5	3	5	4	4
628	2025/1/4 16:37:31	2	2	Sports Training	1	3	4	5	4	4	5	5	4	5	3	4	4	5	4	5	5	4	5	5	4	3	4	5	3	5	3	4	5	4	5	3	4	4
629	2025/1/4 16:37:48	2	1	Physical Education	1	5	4	4	5	5	4	4	4	5	5	4	4	4	5	4	1	4	5	3	4	5	4	4	5	5	4	4	5	4	4	4	5	3
630	2025/1/4 16:37:48	1	2	Sports Training	1	4	4	5	5	3	4	3	5	4	3	4	5	3	5	4	4	4	4	5	4	5	5	4	4	5	3	5	3	3	3	5	5	4
631	2025/1/4 16:38:04	1	1	Physical Education	1	4	3	5	5	5	5	3	3	5	5	4	5	4	3	4	5	5	4	4	5	4	5	4	5	4	4	3	4	4	4	4	5	5
632	2025/1/4 16:38:05	1	2	Sports Training	1	4	3	5	5	4	4	3	5	5	3	4	5	4	5	5	4	3	5	5	4	4	4	1	4	5	5	4	4	5	5	5	5	5
633	2025/1/4 16:38:19	1	1	Physical Education	1	5	5	5	4	5	3	5	3	3	4	4	3	5	4	5	4	3	5	4	5	4	4	4	5	5	4	4	4	5	3	4	5	4
634	2025/1/4 16:38:21	1	2	Sports Training	1	5	4	4	3	4	5	5	4	3	5	4	5	3	3	4	3	3	4	4	1	4	5	4	3	5	3	4	4	4	5	5	3	5
635	2025/1/4 16:38:38	2	1	Sports Training	1	3	4	5	3	3	5	4	5	5	5	4	4	5	5	4	4	4	4	5	3	3	4	4	4	4	5	4	5	4	5	4	5	5
636	2025/1/4 16:38:56	2	2	Sports Training	1	5	4	5	5	3	3	4	5	5	5	4	5	4	4	4	4	4	4	5	5	3	4	4	5	4	5	5	4	4	5	5	5	4
637	2025/1/4 16:38:57	2	1	Physical Education	1	5	4	5	4	5	4	4	5	4	4	5	4	5	4	4	5	5	5	3	5	5	5	4	5	4	4	3	5	4	5	3	3	5
638	2025/1/4 16:39:12	2	1	Sports Training	1	3	5	4	5	5	5	3	5	3	5	4	5	4	4	4	4	3	5	4	3	4	4	4	4	5	3	4	5	4	4	4	4	4
639	2025/1/4 16:39:29	1	1	Physical Education	1	5	5	4	3	4	5	5	4	5	4	5	4	5	3	4	4	4	5	4	4	5	4	5	4	5	4	4	5	4	5	5	4	5
640	2025/1/4 16:39:45	2	1	Sports Training	1	5	4	3	5	5	4	5	3	4	5	4	4	3	4	5	4	5	4	5	5	4	3	4	5	5	3	3	3	5	4	5	5	5
641	2025/1/4 16:39:46	1	2	Physical Education	1	3	4	4	5	5	5	3	5	3	3	5	5	4	5	4	5	3	5	4	4	5	4	5	4	5	3	3	4	5	5	4	4	4
642	2025/1/4 16:40:02	1	1	Physical Education	1	4	4	5	5	4	5	4	4	3	4	4	4	4	4	4	4	4	4	5	5	3	4	5	4	5	4	4	5	4	4	1	4	4
643	2025/1/4 16:40:02	2	1	Sports Training	1	3	4	5	5	4	5	5	4	5	3	3	4	5	4	5	4	5	1	5	4	4	5	5	3	5	4	3	4	4	4	4	4	4
644	2025/1/4 16:40:34	2	2	Physical Education	1	5	4	4	5	5	5	5	5	3	4	3	3	3	3	5	4	4	4	3	5	4	5	4	3	5	3	5	4	5	5	5	5	5
645	2025/1/4 16:40:35	2	1	Sports Training	1	5	5	4	5	3	3	4	4	4	4	4	5	5	4	4	4	5	4	5	5	5	4	4	3	4	3	5	5	5	4	5	5	5
646	2025/1/4 16:40:53	2	1	Sports Training	1	5	5	5	3	4	3	5	4	5	5	4	5	4	3	4	4	4	5	4	4	3	4	5	4	4	4	5	4	4	4	3	4	5
647	2025/1/4 16:40:53	2	2	Physical Education	1	4	4	5	5	5	5	5	4	5	4	4	4	3	3	4	4	5	4	5	4	4	5	5	5	4	3	3	5	4	3	4	4	5
648	2025/1/4 16:41:04	2	1	Physical Education	1	5	5	4	4	5	4	5	4	5	5	5	4	3	3	4	5	5	4	5	5	3	5	4	4	3	3	4	5	5	5	3	5	4
649	2025/1/4 16:41:15	1	1	Physical Education	1	5	4	4	5	5	4	4	4	4	4	5	3	5	3	5	4	4	4	4	4	5	4	5	5	1	5	4	5	5	3	5	4	5
650	2025/1/4 16:41:41	1	2	Physical Education	1	5	4	4	4	4	5	5	4	5	4	4	4	4	5	3	5	3	4	4	5	4	5	4	3	4	4	4	5	5	3	4	4	3
651	2025/1/4 16:41:41	2	2	Sports Training	1	5	3	5	5	5	5	5	4	5	3	3	5	3	5	4	4	5	4	5	5	5	5	4	3	4	4	5	4	4	5	5	4	5
652	2025/1/4 16:41:57	1	2	Physical Education	1	3	4	5	3	4	4	5	5	5	4	3	5	4	5	5	4	3	5	5	5	4	5	4	4	5	5	4	5	4	4	4	4	5
653	2025/1/4 16:42:27	1	2	Physical Education	1	4	5	5	5	3	3	4	4	4	3	4	3	5	5	4	4	5	4	4	4	5	5	5	5	4	4	3	3	4	1	5	4	3
654	2025/1/4 16:42:30	2	2	Sports Training	1	5	3	4	5	5	5	3	4	5	5	4	5	4	5	3	5	3	5	3	4	5	5	5	5	4	4	4	4	5	3	5	4	1
655	2025/1/4 16:42:46	1	2	Physical Education	1	5	4	3	3	4	4	4	3	4	3	4	3	4	5	5	3	4	4	4	4	5	4	4	5	4	4	4	4	5	5	4	5	4
656	2025/1/4 16:42:54	1	2	Sports Training	1	4	3	5	4	5	5	4	5	5	4	4	5	4	4	3	4	5	3	5	4	4	4	5	5	5	5	5	5	1	5	3	5	3
657	2025/1/4 16:43:02	2	1	Physical Education	1	5	4	5	4	5	3	5	5	3	5	4	5	4	5	5	4	4	3	4	5	4	5	4	5	5	4	4	5	4	4	5	5	5
658	2025/1/4 16:43:19	2	2	Physical Education	1	5	3	3	5	3	3	5	3	5	4	4	4	4	5	4	4	4	5	5	3	5	4	4	5	5	4	4	5	4	4	4	5	4
659	2025/1/4 16:43:21	1	2	Sports Training	1	5	4	4	4	3	4	4	4	5	4	4	5	1	4	4	4	5	5	3	4	4	4	5	5	4	5	4	4	4	5	5	5	4
660	2025/1/4 16:43:35	1	2	Sports Training	1	5	4	5	5	5	3	4	4	4	5	4	5	5	4	4	4	5	5	4	4	4	3	4	3	3	5	3	4	5	4	5	4	4
661	2025/1/4 16:43:36	1	2	Physical Education	1	3	3	5	5	5	4	5	3	4	5	4	4	3	3	5	4	4	4	4	4	4	5	5	5	5	4	4	3	4	3	3	4	5
662	2025/1/4 16:43:52	1	1	Physical Education	1	4	5	5	5	5	5	4	3	4	4	3	4	4	1	4	3	4	4	4	4	3	5	4	4	5	4	3	5	4	5	3	5	3
663	2025/1/4 16:44:09	1	2	Sports Training	1	3	5	5	5	4	5	4	5	5	4	5	5	5	3	5	4	4	4	4	3	4	4	4	4	5	5	5	5	3	4	1	5	4
664	2025/1/4 16:44:40	2	1	Sports Training	1	5	4	5	5	4	5	5	3	4	4	4	5	5	5	4	4	5	4	4	4	4	5	4	5	4	4	4	4	5	4	5	5	5
665	2025/1/4 16:44:42	1	2	Physical Education	1	4	4	5	5	5	4	3	4	4	5	5	4	4	4	4	4	5	4	3	5	5	4	4	5	5	4	3	5	5	5	4	5	4
666	2025/1/4 16:44:58	2	2	Sports Training	1	4	5	5	4	4	4	5	5	5	4	5	4	4	4	4	4	5	4	5	5	4	4	5	4	4	3	4	4	4	3	4	5	4
667	2025/1/4 16:44:59	1	1	Physical Education	1	4	5	4	4	4	4	5	4	4	4	5	5	4	4	5	4	5	4	5	3	3	5	3	4	4	4	4	4	4	5	4	5	5
668	2025/1/4 16:45:14	1	1	Sports Training	1	4	4	5	1	5	5	4	5	3	5	5	5	4	4	4	3	5	4	4	4	4	5	4	1	4	4	5	5	5	3	3	3	5
669	2025/1/4 16:45:16	1	2	Physical Education	1	4	4	4	4	3	4	3	4	4	4	5	5	3	5	5	4	4	4	4	5	3	4	3	3	5	4	5	4	5	5	4	5	3
670	2025/1/4 16:45:32	2	1	Sports Training	1	5	4	5	4	5	4	4	4	5	3	5	5	5	5	1	3	4	4	4	3	4	5	5	5	4	4	5	4	4	5	4	5	4
671	2025/1/4 16:45:33	1	1	Physical Education	1	5	5	5	5	5	3	5	4	5	3	5	4	4	4	5	4	5	4	4	3	3	5	5	5	5	5	4	3	5	4	5	5	5
672	2025/1/4 16:46:04	2	2	Physical Education	1	5	4	4	4	4	5	4	5	5	3	4	4	4	4	5	5	3	4	5	3	5	4	3	5	5	4	4	3	4	5	5	4	5
673	2025/1/4 16:46:05	1	1	Sports Training	1	4	3	4	5	5	4	5	4	4	5	4	4	5	4	4	5	4	5	4	5	4	5	5	5	4	5	4	4	4	3	4	4	4
674	2025/1/4 16:46:21	2	2	Sports Training	1	3	5	4	4	5	4	4	4	4	4	4	3	3	5	4	1	4	4	4	4	4	4	3	3	5	5	4	3	4	4	3	4	4
675	2025/1/4 16:46:21	1	1	Physical Education	1	5	5	5	5	5	5	5	4	5	4	3	4	5	5	4	5	3	3	4	4	4	4	5	5	3	4	4	4	4	5	3	4	4
676	2025/1/4 16:46:37	2	1	Physical Education	1	4	5	4	4	3	3	4	3	5	4	5	5	4	4	4	4	3	5	4	3	3	4	4	4	4	4	5	3	5	5	5	4	4
677	2025/1/4 16:46:39	1	1	Sports Training	1	5	4	5	4	5	5	4	3	4	4	4	3	4	5	4	4	5	3	5	5	4	4	3	3	3	5	3	4	5	5	5	4	4
678	2025/1/4 16:46:54	1	2	Physical Education	1	5	4	4	4	5	4	1	4	5	4	4	5	5	4	4	4	5	5	5	4	5	5	5	3	4	3	5	5	4	4	4	5	3
679	2025/1/4 16:46:55	1	2	Sports Training	1	5	5	4	5	5	5	4	4	3	4	4	5	3	4	3	4	4	4	3	4	4	4	5	5	3	4	4	4	4	5	3	5	3
680	2025/1/4 16:47:10	2	2	Sports Training	1	3	4	5	5	5	5	5	4	4	5	4	5	4	4	4	5	5	4	4	3	4	5	5	5	5	4	5	3	5	5	4	4	3
681	2025/1/4 16:47:13	1	1	Physical Education	1	5	4	4	4	3	5	5	5	4	4	4	4	5	4	4	5	5	4	5	5	3	5	4	4	4	5	4	3	4	5	4	4	5
682	2025/1/4 16:47:28	1	2	Physical Education	1	3	5	3	5	4	3	5	4	4	5	5	4	3	4	4	3	5	4	5	5	5	4	4	5	5	4	4	5	4	5	4	4	1
683	2025/1/4 16:47:44	2	1	Sports Training	1	5	4	5	4	4	5	5	3	5	4	4	4	5	4	4	4	5	5	4	5	5	5	4	4	4	5	5	3	3	5	4	5	4
684	2025/1/4 16:47:45	2	2	Physical Education	1	5	5	5	5	4	5	4	4	5	4	4	3	3	3	4	3	4	3	5	5	4	5	4	4	5	5	5	3	4	4	3	4	5
685	2025/1/4 16:48:02	1	2	Physical Education	1	4	4	4	5	4	3	5	1	5	4	5	4	4	5	5	5	5	4	3	4	4	5	4	3	3	4	4	3	5	4	5	3	5
686	2025/1/4 16:48:04	2	1	Sports Training	1	5	4	3	5	5	4	3	4	5	5	4	4	3	3	3	5	4	4	5	4	4	5	4	5	4	5	5	3	4	3	3	3	4
687	2025/1/4 16:48:17	1	2	Sports Training	1	5	3	4	3	1	5	3	4	3	5	5	4	3	5	4	4	5	5	4	5	3	4	5	4	5	5	5	5	4	5	5	3	4
688	2025/1/4 16:48:32	2	2	Sports Training	1	3	4	5	4	5	5	5	4	5	4	3	4	4	5	5	5	5	3	4	3	5	4	3	3	4	5	4	3	4	5	4	4	4
689	2025/1/4 16:48:34	1	2	Physical Education	1	4	5	5	5	3	4	4	5	5	4	3	3	4	4	5	4	4	4	5	4	4	4	4	5	3	4	3	5	5	3	4	4	4
690	2025/1/4 16:48:49	2	2	Sports Training	1	5	4	5	5	4	1	5	4	3	5	5	4	4	5	5	4	3	4	5	4	5	5	5	4	5	4	4	5	5	3	5	4	3
691	2025/1/4 16:48:51	1	2	Physical Education	1	4	3	5	5	4	5	5	4	4	3	4	4	3	5	3	3	3	3	5	4	3	5	4	3	5	3	5	5	5	5	5	5	4
692	2025/1/4 16:49:06	2	1	Physical Education	1	5	5	5	5	3	5	4	5	4	5	4	4	4	4	4	5	3	4	5	4	4	5	4	5	5	4	5	3	4	3	3	4	5
693	2025/1/4 16:49:07	2	2	Sports Training	1	3	4	4	4	5	4	3	4	3	4	5	5	5	4	4	5	4	4	5	5	4	4	5	5	5	4	5	3	5	3	5	5	3
694	2025/1/4 16:49:23	2	1	Physical Education	1	5	5	3	4	4	5	4	4	5	5	4	4	5	4	4	4	5	5	3	4	5	5	5	5	4	4	4	5	5	5	3	5	3
695	2025/1/4 16:49:39	1	2	Sports Training	1	3	4	4	4	4	4	5	3	5	4	3	4	5	3	5	4	3	4	5	4	4	4	4	5	5	4	5	5	5	5	4	4	3
696	2025/1/4 16:49:57	1	2	Sports Training	1	5	5	4	3	4	3	3	5	5	4	4	4	5	4	5	4	5	4	4	3	5	4	3	4	4	4	4	3	5	4	4	4	4
697	2025/1/4 16:50:10	2	1	Physical Education	1	4	3	5	3	4	4	5	4	5	5	5	5	5	5	4	4	3	4	5	4	3	3	3	4	4	4	3	4	5	4	3	5	5
698	2025/1/4 16:50:26	2	1	Sports Training	1	4	4	5	4	5	3	3	4	3	5	4	4	5	5	5	4	4	4	4	5	5	5	5	5	3	3	4	5	4	3	3	5	5
699	2025/1/4 16:50:27	1	2	Physical Education	1	3	4	5	5	5	5	5	4	3	1	4	5	4	1	3	4	4	4	4	5	4	5	5	3	4	4	3	5	5	5	5	4	5
700	2025/1/4 16:50:43	2	1	Sports Training	1	5	5	4	5	4	3	4	5	5	5	5	5	5	3	4	3	4	5	4	4	4	4	5	4	4	3	5	5	4	5	5	4	4
701	2025/1/4 16:50:50	1	2	Physical Education	1	5	4	5	5	3	4	5	4	5	4	4	3	5	5	4	4	5	5	4	4	4	4	1	4	1	4	4	3	3	3	5	3	5
702	2025/1/4 16:51:01	2	2	Physical Education	1	5	4	4	4	5	5	4	4	4	4	3	4	4	3	5	4	5	5	4	4	3	4	4	3	4	4	4	4	4	4	5	3	5
703	2025/1/4 16:51:16	1	2	Sports Training	1	5	5	5	5	3	5	3	5	5	4	5	5	5	3	4	5	3	4	4	4	5	4	3	3	4	4	5	3	4	4	4	4	4
704	2025/1/4 16:51:17	2	1	Physical Education	1	4	5	5	5	5	5	4	4	5	5	3	4	5	5	3	4	4	4	5	5	3	5	4	4	5	4	3	4	3	5	5	5	4
705	2025/1/4 16:51:32	1	2	Sports Training	1	5	4	5	5	5	4	5	1	1	5	5	4	4	4	3	4	5	3	4	4	5	3	5	5	3	4	5	3	4	4	5	5	3
706	2025/1/4 16:51:35	1	2	Physical Education	1	5	4	5	3	1	5	4	4	3	4	5	5	5	3	5	3	4	4	4	5	4	3	4	4	5	3	4	4	3	3	5	3	3
707	2025/1/4 16:52:07	1	1	Sports Training	1	5	4	3	4	3	5	5	3	5	3	5	4	4	5	3	3	5	1	4	4	3	4	4	5	5	4	5	3	3	4	3	5	3
708	2025/1/4 16:52:23	1	2	Physical Education	1	5	4	4	5	3	3	5	5	5	4	4	5	5	5	4	3	5	4	5	3	5	4	4	5	5	5	4	3	1	4	5	4	5
709	2025/1/4 16:52:24	2	1	Sports Training	1	3	4	5	4	5	5	4	4	5	3	4	4	4	5	4	5	4	4	4	5	4	5	4	5	4	3	3	5	4	3	5	5	4
710	2025/1/4 16:52:39	2	1	Physical Education	1	5	4	5	4	5	5	5	4	5	5	5	3	4	5	4	4	3	5	4	5	4	3	4	5	4	4	4	5	4	4	4	4	4
711	2025/1/4 16:52:42	2	1	Sports Training	1	3	4	5	3	3	5	4	3	5	4	5	5	5	5	5	5	5	3	4	5	4	3	5	4	4	4	5	4	5	3	5	4	5
712	2025/1/4 16:52:56	2	2	Physical Education	1	5	5	5	5	3	5	3	4	3	4	4	4	4	4	5	3	1	5	5	5	3	5	5	4	4	4	5	4	4	5	5	3	3
713	2025/1/4 16:52:58	2	1	Sports Training	1	5	3	5	3	5	5	4	4	5	4	4	5	5	4	5	3	5	4	5	5	4	5	5	5	3	4	4	5	4	4	3	4	5
714	2025/1/4 16:53:07	2	1	Physical Education	1	4	4	4	4	4	4	3	5	4	5	5	4	4	4	5	3	5	5	5	1	5	4	5	4	5	5	4	5	4	3	5	3	3
715	2025/1/4 16:53:08	2	1	Sports Training	1	5	5	5	4	3	5	4	4	5	5	5	5	4	3	4	4	5	5	4	4	5	3	5	3	4	5	5	3	3	3	4	4	5
716	2025/1/4 16:53:16	2	2	Physical Education	1	5	5	5	5	4	5	5	5	3	4	4	5	5	4	3	4	5	5	4	5	5	4	4	5	4	4	4	3	4	3	5	4	4
717	2025/1/4 16:53:21	2	2	Sports Training	1	4	4	3	4	5	4	4	5	3	4	3	5	5	3	5	5	4	4	5	5	4	5	4	5	4	4	4	4	4	3	5	4	5
718	2025/1/4 16:53:37	2	1	Physical Education	1	4	4	4	5	4	5	5	5	5	4	4	4	4	4	5	4	4	4	5	4	5	4	5	4	5	4	5	4	5	4	3	4	3
719	2025/1/4 16:53:54	1	2	Physical Education	1	3	4	5	5	3	4	3	5	5	3	5	5	3	3	4	4	5	4	5	5	5	5	3	5	3	5	4	4	4	4	3	5	4
720	2025/1/4 16:54:00	2	1	Sports Training	1	5	5	4	5	3	5	5	4	5	3	5	5	4	5	3	4	5	5	5	4	5	4	4	4	5	5	4	5	3	5	5	5	5
721	2025/1/4 16:54:27	1	2	Physical Education	1	4	5	5	5	5	5	5	4	4	3	4	5	5	5	4	4	4	4	4	4	4	5	4	4	3	3	5	4	4	5	3	5	4
722	2025/1/4 16:54:44	1	2	Physical Education	1	5	3	4	4	4	4	4	5	4	4	5	4	4	5	5	5	3	4	4	5	4	5	5	4	5	4	5	5	4	4	4	3	5
723	2025/1/4 16:55:01	2	1	Physical Education	1	4	5	4	5	5	5	5	5	5	4	5	4	5	4	4	5	5	4	4	4	5	4	5	5	4	4	5	5	5	4	5	5	4
724	2025/1/4 16:56:21	2	2	Physical Education	1	5	4	1	5	5	5	4	5	5	5	5	4	3	4	4	4	5	5	5	3	4	4	4	5	4	3	4	4	3	5	3	4	5
725	2025/1/4 16:56:36	2	2	Physical Education	1	4	3	5	4	5	5	4	5	4	5	3	4	4	5	5	3	4	5	4	3	3	5	4	4	1	5	5	5	4	4	4	4	4
726	2025/1/4 16:56:53	2	1	Physical Education	1	5	5	5	3	3	5	4	4	5	5	4	4	4	5	5	4	5	4	5	4	4	4	5	3	5	4	3	4	4	3	4	3	4
727	2025/1/4 16:57:26	1	2	Physical Education	1	3	5	5	4	5	3	4	4	5	3	5	4	4	5	4	5	3	4	3	3	4	4	4	5	5	3	5	4	4	5	4	5	3
728	2025/1/4 16:57:42	1	2	Physical Education	1	4	5	4	5	4	4	5	4	5	4	4	4	4	4	4	4	5	5	5	4	4	4	5	4	5	4	5	5	5	4	3	4	5
729	2025/1/4 16:58:15	2	1	Physical Education	1	5	5	4	5	5	5	5	3	5	4	1	4	4	5	4	4	5	5	5	5	4	3	5	4	4	4	5	4	5	4	5	4	5
730	2025/1/4 16:58:47	1	2	Physical Education	1	4	5	5	5	4	3	4	4	5	5	5	5	5	5	5	4	3	5	4	3	5	4	5	4	3	3	4	5	5	5	5	3	5
731	2025/1/4 16:59:25	1	2	Physical Education	1	5	5	4	4	4	4	3	5	5	5	4	3	5	4	4	4	5	4	5	5	4	3	4	4	4	3	5	3	4	4	5	5	5
732	2025/1/4 16:59:40	2	2	Physical Education	1	3	3	5	4	5	5	5	4	4	5	5	5	5	5	4	5	3	5	4	5	3	3	4	5	5	4	4	3	4	3	1	4	4
733	2025/1/4 16:59:56	2	2	Physical Education	1	4	5	4	4	5	5	3	5	4	4	4	4	5	5	3	4	3	5	3	5	3	4	4	5	5	3	3	5	4	4	4	4	5
734	2025/1/4 17:00:14	2	2	Physical Education	1	4	4	3	4	5	5	4	5	5	4	4	5	5	4	5	4	5	5	5	4	4	5	5	5	4	4	3	5	5	4	3	5	5
735	2025/1/4 17:00:31	1	2	Physical Education	1	4	4	5	3	5	5	5	5	5	4	5	4	3	3	3	3	5	5	4	4	3	5	4	4	4	5	4	4	4	3	5	4	4
736	2025/1/4 17:00:45	1	1	Physical Education	1	4	5	5	3	4	4	5	4	5	5	3	5	5	3	4	4	3	5	4	3	4	5	5	4	4	3	5	3	4	3	5	5	5
737	2025/1/4 17:01:03	1	2	Physical Education	1	4	5	5	4	4	5	3	4	5	5	5	1	4	4	4	5	4	5	4	3	4	1	3	4	5	5	4	4	4	4	5	4	5
738	2025/1/4 17:01:20	1	2	Physical Education	1	5	5	5	5	5	5	4	5	3	3	5	3	5	3	4	5	5	4	4	5	4	4	4	4	5	1	3	4	4	4	5	4	5
739	2025/1/4 17:01:36	1	2	Physical Education	1	4	4	4	5	4	5	5	4	3	5	4	3	5	5	5	4	3	4	4	4	4	5	5	4	5	4	5	4	4	5	5	4	5
740	2025/1/4 17:01:50	1	1	Physical Education	1	3	5	4	5	5	5	4	5	3	5	4	5	3	4	5	4	4	4	5	4	5	5	5	4	4	3	4	3	4	4	4	4	5
741	2025/1/4 17:02:07	1	1	Physical Education	1	5	4	3	5	5	5	5	4	4	4	3	5	5	4	3	4	5	3	4	3	4	3	5	4	4	4	5	4	5	3	5	4	5
742	2025/1/4 17:02:25	1	1	Physical Education	1	5	4	5	5	5	3	5	4	3	4	3	4	5	3	4	5	5	5	5	5	5	4	3	4	4	4	4	5	4	3	4	4	4
743	2025/1/4 17:02:42	1	2	Physical Education	1	4	4	5	5	5	4	4	4	3	3	5	4	5	4	5	4	3	5	4	3	5	4	4	5	4	5	5	5	5	3	5	4	4
744	2025/1/4 17:02:59	2	1	Physical Education	1	5	3	3	5	5	5	4	4	4	5	5	5	5	3	4	4	5	4	3	5	4	4	5	4	4	4	5	4	5	5	3	3	3
745	2025/1/4 17:03:16	1	1	Physical Education	1	4	3	5	3	4	3	5	4	5	4	5	4	5	4	3	4	5	4	4	4	5	3	4	4	3	5	4	5	5	5	4	5	5
746	2025/1/4 17:03:32	1	2	Physical Education	1	5	3	5	5	5	5	4	4	3	5	4	3	5	4	5	3	4	4	4	5	3	5	4	5	4	4	4	5	3	5	5	5	4
747	2025/1/4 17:03:53	2	2	Physical Education	1	4	5	5	5	4	3	5	5	5	1	3	5	5	3	5	4	5	4	5	5	5	5	4	4	4	3	4	4	4	5	5	5	4
748	2025/1/4 17:04:20	1	1	Physical Education	1	5	5	5	5	5	5	5	4	3	4	4	5	4	5	5	3	5	5	5	4	3	4	4	5	4	4	3	4	4	4	4	4	4
749	2025/1/4 17:04:37	2	2	Physical Education	1	3	4	3	3	3	4	5	5	5	4	5	3	5	4	4	4	3	4	4	4	4	3	4	4	4	4	5	3	4	4	5	1	4
750	2025/1/4 17:04:53	1	2	Physical Education	1	4	5	5	5	5	5	3	4	4	5	5	5	5	4	4	4	3	4	5	5	5	5	4	5	4	4	4	5	5	5	4	5	5
751	2025/1/4 17:05:05	1	2	Physical Education	1	5	4	4	4	3	3	5	5	5	4	5	4	5	3	5	5	5	3	5	4	4	3	4	4	4	4	4	4	4	5	4	5	5
752	2025/1/4 17:05:27	1	2	Physical Education	1	5	4	3	3	3	4	5	5	5	4	4	3	5	4	4	5	1	4	5	4	3	3	3	4	4	3	4	5	5	4	5	4	5
753	2025/1/4 17:05:47	1	1	Physical Education	1	1	5	5	5	5	5	4	4	5	5	4	5	5	4	5	3	3	5	5	4	5	5	5	5	5	3	4	5	3	3	4	5	3
754	2025/1/4 17:06:05	1	2	Physical Education	1	5	4	4	5	5	5	5	5	3	1	5	3	4	5	4	4	5	5	4	3	4	3	5	4	5	4	4	3	4	5	5	4	5
755	2025/1/4 17:06:21	2	2	Physical Education	1	5	5	4	4	3	5	3	5	5	5	4	3	4	4	4	5	5	5	4	5	5	3	5	5	4	4	4	4	4	3	5	3	3
756	2025/1/4 17:06:38	1	1	Physical Education	1	5	4	5	5	5	3	4	4	3	4	3	3	5	4	5	4	4	4	4	4	4	5	5	3	4	4	4	3	4	5	5	4	5
757	2025/1/4 17:06:56	2	2	Physical Education	1	3	4	5	4	5	4	5	4	4	4	5	5	5	5	5	4	5	4	5	4	4	3	4	5	4	3	3	4	5	4	5	4	3
758	2025/1/4 17:07:17	1	1	Physical Education	1	3	5	5	5	5	4	5	5	4	4	4	5	5	5	4	4	3	4	3	3	4	5	5	4	5	4	5	5	4	5	5	4	5
759	2025/1/4 17:07:43	2	2	Physical Education	1	5	4	5	4	5	5	5	5	4	5	4	4	3	3	5	4	3	4	3	5	4	4	4	4	3	4	4	5	3	3	3	4	5
760	2025/1/4 17:08:01	1	2	Physical Education	1	5	4	5	1	4	4	5	4	5	4	4	5	5	5	4	4	5	5	4	4	5	4	4	4	3	5	4	4	5	5	5	4	5
761	2025/1/4 17:08:18	1	1	Physical Education	1	5	5	3	4	5	4	3	5	5	4	4	5	5	5	4	4	5	4	4	5	4	5	5	5	4	4	3	4	4	3	5	4	4
762	2025/1/4 17:08:36	1	1	Physical Education	1	3	5	5	4	4	4	5	5	5	3	5	4	3	3	5	3	3	4	5	5	3	5	3	3	5	5	5	4	4	4	5	4	4
763	2025/1/4 17:08:53	1	2	Physical Education	1	5	4	5	4	3	5	5	4	5	3	5	5	4	4	5	3	3	4	4	5	5	4	5	4	3	4	4	4	4	3	5	4	4
764	2025/1/4 17:09:08	2	1	Physical Education	1	5	5	3	5	5	5	5	5	5	5	4	5	4	4	3	4	5	4	3	4	4	3	4	4	3	5	5	4	4	5	5	5	4
765	2025/1/4 17:09:59	1	1	Physical Education	1	5	4	5	5	4	4	5	5	5	3	5	4	4	5	5	4	5	4	5	5	5	4	4	4	4	4	4	4	3	5	3	4	4
766	2025/1/4 17:10:16	1	1	Physical Education	1	5	3	5	4	5	5	4	5	5	3	4	4	3	3	5	4	5	4	4	3	3	4	5	3	4	5	5	5	4	4	4	5	4
767	2025/1/4 17:10:34	2	1	Physical Education	1	5	5	5	3	4	5	5	5	5	5	5	4	4	4	5	5	4	5	3	3	5	5	3	5	4	4	4	5	5	3	4	5	4
768	2025/1/4 17:10:51	1	1	Physical Education	1	3	4	5	5	4	4	5	4	5	4	3	4	5	3	5	3	4	4	5	5	3	5	3	3	5	4	5	5	5	3	5	5	4
769	2025/1/4 17:11:08	2	1	Physical Education	1	5	4	4	3	4	5	4	4	4	4	5	5	5	5	3	5	4	4	4	4	5	5	5	4	4	4	4	4	4	3	3	5	4
770	2025/1/4 17:11:25	1	2	Physical Education	1	5	4	5	5	5	4	4	3	5	3	3	5	3	5	4	5	5	4	5	5	5	5	3	4	5	3	4	4	1	4	5	4	4
771	2025/1/4 17:11:42	1	2	Physical Education	1	5	4	5	4	4	5	4	4	4	4	3	5	3	5	5	5	3	4	5	4	4	5	5	5	4	3	5	4	5	5	5	3	4
772	2025/1/4 17:11:57	1	2	Physical Education	1	4	4	4	5	4	5	5	4	4	5	4	5	4	3	5	5	4	4	1	4	4	3	4	5	5	4	5	5	4	4	5	5	5
773	2025/1/4 17:12:15	2	2	Physical Education	1	5	4	4	5	5	5	3	3	5	4	4	1	4	3	3	5	5	5	4	5	4	3	5	5	4	1	3	3	5	3	5	4	4
774	2025/1/4 17:12:31	1	2	Physical Education	1	4	5	4	4	5	3	5	4	5	5	4	5	5	5	5	4	5	4	4	4	5	5	5	5	5	3	4	5	5	5	5	4	3
775	2025/1/4 17:12:52	1	1	Physical Education	1	4	5	5	4	4	5	3	5	5	4	3	5	4	5	3	4	5	3	5	5	4	4	5	4	5	4	5	5	5	4	4	5	5
776	2025/1/4 17:13:07	1	1	Physical Education	1	3	4	5	5	5	4	5	4	4	5	3	5	3	4	4	4	4	4	5	1	4	4	5	5	4	3	3	5	4	5	3	4	4
777	2025/1/4 17:13:24	1	2	Physical Education	1	3	5	4	5	3	5	5	5	5	5	5	4	4	4	5	4	4	4	5	5	3	5	5	3	5	3	4	4	5	4	5	5	5
778	2025/1/4 17:13:40	2	1	Physical Education	1	3	4	5	5	3	4	4	4	5	4	4	4	4	3	3	3	5	4	4	4	3	3	3	3	4	3	4	3	4	5	4	4	3
779	2025/1/4 17:14:13	1	2	Physical Education	1	5	3	5	4	3	4	5	4	5	4	5	4	4	4	5	4	3	3	5	3	5	4	3	5	4	3	5	3	5	5	4	5	4
780	2025/1/4 17:14:31	2	2	Physical Education	1	5	4	3	4	4	5	5	4	4	4	5	4	4	5	4	4	5	4	5	3	5	3	5	5	5	4	5	5	4	5	4	5	5
781	2025/1/4 17:14:51	1	1	Physical Education	1	5	4	5	4	5	5	5	5	5	4	5	4	4	5	5	3	4	3	5	5	4	4	3	5	5	5	4	3	3	4	3	4	5
782	2025/1/4 17:15:07	2	2	Physical Education	1	5	4	3	4	5	5	3	5	5	5	3	5	5	4	4	4	5	4	4	4	5	4	5	5	5	5	4	4	4	5	5	3	5
783	2025/1/4 17:15:23	2	2	Physical Education	1	4	4	5	5	5	4	3	4	4	4	3	5	5	5	4	4	5	4	4	4	4	5	3	5	5	4	5	3	3	3	5	5	4
784	2025/1/4 17:15:39	2	1	Physical Education	1	4	5	4	5	4	4	5	4	5	5	5	4	4	3	4	4	5	4	5	4	1	4	4	4	5	4	3	4	4	4	4	4	5
785	2025/1/4 17:15:57	1	1	Physical Education	1	4	5	4	5	4	3	5	4	5	5	3	4	4	5	4	4	5	4	3	3	5	5	4	4	5	3	3	4	4	5	4	5	5
786	2025/1/4 17:16:14	1	1	Physical Education	1	5	4	3	5	3	4	5	5	4	5	5	5	5	1	5	4	5	1	4	5	5	5	4	5	4	5	5	4	4	4	3	4	5
787	2025/1/4 17:16:50	1	1	Physical Education	1	5	4	5	5	5	5	4	4	5	4	4	4	4	3	5	5	5	5	5	4	4	5	5	5	5	5	5	3	5	5	5	5	3
788	2025/1/4 17:17:09	2	2	Physical Education	1	4	4	5	3	3	4	4	4	3	5	5	5	4	5	4	4	5	4	4	5	3	4	5	3	3	4	5	4	4	4	5	4	5
789	2025/1/4 17:17:44	2	2	Physical Education	1	3	5	5	5	3	5	5	3	5	4	3	4	4	4	1	4	5	4	3	5	5	5	4	5	4	4	3	4	4	3	4	4	3
790	2025/1/4 17:18:01	2	1	Physical Education	1	5	4	3	5	4	5	5	4	4	4	5	4	5	5	4	4	5	5	4	4	5	4	5	5	5	4	5	5	4	3	5	4	5
791	2025/1/4 17:18:12	1	2	Physical Education	1	3	4	5	5	4	4	3	4	3	4	4	3	5	4	5	5	5	4	4	5	4	5	5	5	5	5	4	5	4	4	5	5	5
792	2025/1/4 17:18:22	2	1	Physical Education	1	5	4	4	5	4	5	3	4	5	5	4	5	4	3	5	4	3	5	4	5	5	5	4	3	4	5	5	5	4	4	4	3	4
793	2025/1/4 17:18:43	1	2	Physical Education	1	1	5	4	5	4	3	4	4	5	3	4	3	4	4	5	4	5	3	3	5	4	4	5	3	4	4	4	4	4	4	4	3	4
794	2025/1/4 17:19:00	2	1	Physical Education	1	3	4	5	4	4	5	5	4	5	3	3	4	5	5	5	5	4	4	5	3	3	4	3	5	5	3	4	5	4	5	5	4	5
795	2025/1/4 17:19:19	1	2	Physical Education	1	5	5	5	5	5	5	3	4	3	5	4	4	4	3	1	4	5	5	5	4	5	4	4	3	3	3	3	4	5	5	5	4	4
796	2025/1/4 17:19:37	2	2	Physical Education	1	4	4	5	5	5	5	4	3	3	3	4	5	3	3	4	5	4	5	3	5	4	5	4	4	5	4	4	3	4	3	5	4	4
797	2025/1/4 17:19:54	2	2	Physical Education	1	4	5	5	5	5	5	3	4	5	4	4	4	4	5	5	4	3	5	4	5	4	4	4	4	4	5	3	4	4	4	3	4	5
798	2025/1/4 17:20:13	1	1	Physical Education	1	5	4	5	4	5	5	5	5	5	5	4	5	5	4	4	3	5	4	5	4	4	5	3	5	5	4	4	4	4	5	4	5	5
799	2025/1/4 17:20:30	1	1	Physical Education	1	4	5	5	5	4	4	3	5	5	4	3	5	4	5	5	3	4	5	5	4	5	5	5	4	4	5	5	4	4	5	5	5	5
800	2025/1/4 17:20:48	1	1	Physical Education	1	5	4	4	3	3	4	5	4	5	5	5	4	5	4	4	4	5	5	5	3	3	3	4	4	5	4	4	5	4	3	5	5	4
801	2025/1/4 17:21:04	2	1	Physical Education	1	4	5	5	5	3	5	5	3	5	5	4	3	4	3	4	4	4	4	5	5	5	4	5	5	5	3	4	1	4	4	5	3	3
802	2025/1/4 17:21:20	2	1	Physical Education	1	3	3	3	4	4	5	5	3	5	5	5	4	5	5	4	4	4	5	3	5	5	3	5	4	5	5	5	5	4	5	5	5	4
803	2025/1/4 17:21:56	2	2	Physical Education	1	5	4	3	5	5	4	5	4	4	5	4	5	4	5	4	4	1	4	3	5	3	4	5	3	4	4	4	5	5	4	5	5	4
804	2025/1/4 17:22:13	2	2	Physical Education	1	5	5	3	5	5	4	5	4	4	5	4	3	4	4	4	5	5	4	3	4	5	4	4	5	5	4	3	5	4	4	5	3	5
805	2025/1/4 17:22:30	1	1	Physical Education	1	5	4	3	5	5	5	5	4	5	4	3	4	5	5	3	4	3	3	4	4	4	3	4	4	1	5	5	5	4	4	3	5	5
806	2025/1/4 17:22:48	1	2	Physical Education	1	5	4	4	5	4	5	5	5	4	5	5	5	4	4	3	3	4	4	5	5	5	5	5	5	5	4	4	4	4	5	5	5	5
807	2025/1/4 17:23:03	2	2	Physical Education	1	5	4	3	5	4	5	3	4	5	5	3	5	5	5	5	3	5	4	5	5	4	5	3	5	4	4	4	3	5	3	5	5	4
808	2025/1/4 17:23:37	1	2	Physical Education	1	4	5	5	5	4	3	3	4	3	3	3	4	5	4	5	5	3	3	5	4	3	4	4	4	4	5	5	3	3	5	4	4	4
809	2025/1/4 17:23:54	1	2	Physical Education	1	5	4	5	5	5	5	3	4	5	4	4	4	3	4	4	4	5	4	5	4	4	3	4	4	5	4	4	5	5	5	5	4	4
810	2025/1/4 17:24:11	2	2	Physical Education	1	5	4	5	4	5	5	5	4	5	5	4	4	5	5	5	4	4	5	4	5	4	5	4	4	4	4	5	5	4	3	4	5	4
811	2025/1/4 17:24:27	2	2	Physical Education	1	5	4	5	5	3	4	4	3	5	3	4	5	5	5	5	3	4	4	5	3	4	5	4	5	1	3	4	5	5	5	5	5	5
812	2025/1/4 17:24:43	1	1	Physical Education	1	5	4	5	5	4	5	5	4	5	4	4	4	4	3	4	3	3	4	1	4	5	5	3	5	5	4	4	4	4	3	5	4	5
813	2025/1/4 17:25:02	1	1	Physical Education	1	4	4	5	5	4	3	5	4	4	4	5	4	5	5	5	4	4	4	4	4	5	3	5	4	4	3	5	5	5	5	4	5	4
814	2025/1/4 17:25:16	2	2	Physical Education	1	5	4	5	3	4	4	5	5	5	5	4	5	5	4	5	3	4	4	4	4	4	4	3	4	4	4	5	5	3	3	3	5	4
815	2025/1/4 17:26:06	2	1	Physical Education	1	4	5	5	5	3	5	5	4	4	4	5	4	3	4	5	4	4	4	4	5	5	5	3	5	5	4	4	4	5	5	3	5	5
816	2025/1/4 17:26:23	1	2	Physical Education	1	5	5	4	4	5	5	3	5	3	4	5	5	4	4	3	4	3	4	4	5	5	5	5	5	4	4	5	4	3	5	5	5	3
817	2025/1/4 17:26:40	2	2	Physical Education	1	4	4	4	5	4	5	3	5	5	4	4	5	4	5	5	3	5	3	5	4	4	4	3	5	5	4	4	5	5	5	5	4	5
818	2025/1/4 17:26:59	1	2	Physical Education	1	5	4	3	5	3	4	4	4	4	5	3	3	5	3	4	5	3	5	5	4	4	3	4	4	4	5	3	4	4	4	5	5	5
819	2025/1/4 17:27:17	2	1	Physical Education	1	5	4	5	5	3	4	5	4	5	4	4	4	5	5	4	5	5	4	5	5	4	4	4	4	5	1	4	5	4	4	5	3	5
820	2025/1/4 17:28:09	1	2	Physical Education	1	3	5	5	5	5	5	5	4	4	4	5	4	5	4	4	5	5	4	5	5	4	3	3	4	3	4	4	5	5	3	4	4	5
821	2025/1/4 17:28:28	1	2	Physical Education	1	4	5	5	5	3	4	3	3	5	5	3	5	5	4	5	5	4	4	3	5	4	5	4	3	5	4	4	5	4	4	3	5	4
822	2025/1/4 17:28:44	2	1	Physical Education	1	5	4	5	3	4	3	5	4	4	4	4	5	4	4	5	4	5	4	4	5	5	5	5	3	3	4	4	4	4	3	5	4	4
823	2025/1/4 17:29:00	2	1	Physical Education	1	5	4	5	5	5	5	4	5	4	3	3	4	3	4	4	5	5	1	4	5	4	5	5	5	4	5	3	4	4	3	5	5	5
824	2025/1/4 17:29:18	1	1	Physical Education	1	5	5	3	4	4	5	4	4	3	4	4	4	4	5	5	4	4	5	5	4	3	4	3	5	3	4	3	4	4	5	5	4	3
825	2025/1/4 17:29:40	1	2	Physical Education	1	5	3	3	4	4	3	4	4	5	3	4	5	5	3	3	3	5	4	4	5	4	4	3	5	3	1	4	4	3	4	3	5	5
826	2025/1/4 17:29:57	1	2	Physical Education	1	3	5	4	5	4	4	4	4	5	4	4	5	4	3	5	4	4	5	4	3	4	4	4	5	3	4	4	3	4	5	5	4	4
827	2025/1/4 17:30:16	1	2	Physical Education	1	3	3	5	5	3	4	5	5	5	5	4	3	4	4	4	4	5	4	5	4	4	4	5	5	4	5	5	5	4	5	3	4	4
828	2025/1/4 17:30:48	1	1	Physical Education	1	4	4	5	5	3	5	5	3	5	3	4	4	5	4	5	5	4	4	4	3	3	4	3	4	5	4	5	4	5	5	4	3	4
829	2025/1/4 17:31:07	1	2	Physical Education	1	4	4	3	4	5	4	5	4	4	4	4	4	4	5	5	5	5	4	5	4	5	3	5	5	4	3	3	5	4	5	5	5	3
830	2025/1/4 17:31:26	2	1	Physical Education	1	5	4	4	3	5	5	5	4	4	4	5	5	4	5	5	5	4	4	4	5	4	5	5	3	4	4	4	5	4	3	5	5	5
831	2025/1/4 17:32:01	1	1	Physical Education	1	4	4	5	3	5	3	4	4	4	4	4	5	5	4	4	5	5	4	4	5	4	4	5	5	5	5	5	3	5	5	4	5	4
832	2025/1/4 17:32:34	2	1	Physical Education	1	5	5	5	5	1	5	5	4	5	4	4	3	5	5	1	4	5	5	5	4	4	5	5	3	5	3	5	4	4	5	5	4	4
833	2025/1/4 17:34:19	1	1	Physical Education	1	5	5	5	5	5	5	4	4	5	4	5	5	5	5	4	4	3	4	4	4	5	3	5	5	4	3	4	4	4	3	5	5	5
834	2025/1/4 17:34:36	1	2	Physical Education	1	4	5	4	5	4	5	5	3	3	4	5	3	4	5	4	4	5	4	5	5	3	3	5	5	5	4	4	5	4	5	5	5	3
835	2025/1/4 17:34:53	2	2	Physical Education	1	5	4	4	5	5	5	5	4	4	5	4	4	1	4	4	3	4	5	4	3	4	5	4	3	4	5	4	4	3	3	5	5	5
836	2025/1/4 17:35:15	1	1	Physical Education	1	5	4	5	5	5	4	5	4	4	4	4	4	5	5	5	4	4	3	4	3	4	5	5	4	4	3	4	5	4	4	5	3	4
837	2025/1/4 17:35:32	2	2	Physical Education	1	4	5	5	5	5	5	5	4	3	4	4	3	4	5	4	4	3	4	4	4	4	4	4	3	5	5	3	4	4	5	5	5	4
838	2025/1/4 17:35:51	2	1	Physical Education	1	4	4	5	4	5	4	5	5	5	5	4	4	4	3	5	4	5	4	5	4	4	5	4	5	4	3	3	4	4	5	5	5	5
839	2025/1/4 17:36:06	2	2	Physical Education	1	3	4	3	5	4	5	5	4	5	4	5	4	4	4	4	4	5	4	4	5	5	4	5	4	4	4	3	5	5	5	5	4	5
840	2025/1/4 17:36:23	1	2	Physical Education	1	5	4	3	4	4	4	5	4	3	3	4	5	4	3	4	4	3	5	5	5	5	4	5	5	5	4	4	5	4	5	4	4	4
841	2025/1/4 17:36:42	2	1	Physical Education	1	5	4	5	5	3	4	4	4	4	5	4	4	3	5	4	5	5	5	3	4	3	4	3	3	3	5	4	5	3	4	5	5	5
842	2025/1/4 17:36:59	2	1	Physical Education	1	3	5	4	4	4	5	5	5	4	4	3	3	4	4	5	4	5	4	4	4	5	5	4	5	5	4	5	3	5	4	4	4	5
843	2025/1/4 17:38:57	2	2	Physical Education	1	5	4	5	5	4	4	5	4	3	5	4	5	5	4	5	4	5	4	4	3	3	4	4	5	4	4	3	5	4	4	5	4	3
844	2025/1/4 17:39:17	2	1	Physical Education	1	5	1	4	5	5	5	3	4	4	5	5	5	1	5	4	4	4	4	4	5	5	4	1	4	5	5	5	5	1	5	3	5	3
845	2025/1/4 17:39:54	2	1	Physical Education	1	4	5	4	4	4	5	5	4	5	4	5	5	5	4	5	4	4	5	4	5	3	4	5	4	5	5	4	4	4	4	5	5	5
846	2025/1/4 17:40:30	2	2	Physical Education	1	3	5	5	4	5	5	5	4	5	5	5	3	4	5	1	4	5	4	5	4	4	5	5	4	5	4	3	5	5	4	5	5	5
847	2025/1/4 17:40:47	1	2	Physical Education	1	5	5	5	4	4	4	4	4	5	5	3	4	5	5	4	5	5	5	4	4	4	5	4	5	3	4	4	3	5	4	5	5	4
848	2025/1/4 17:41:20	2	2	Physical Education	1	5	4	5	5	5	5	3	4	5	5	4	4	4	4	5	4	3	5	5	4	3	3	5	3	5	4	4	4	4	3	4	4	3
849	2025/1/4 17:41:42	1	2	Physical Education	1	5	5	5	5	5	5	5	4	5	5	5	5	4	4	5	5	4	4	5	4	4	5	5	4	5	4	4	4	3	4	3	5	5
850	2025/1/4 17:41:57	1	1	Physical Education	1	4	4	4	4	4	3	5	5	5	3	5	4	4	5	4	5	5	4	5	5	4	3	4	4	3	4	4	5	3	5	5	3	5
851	2025/1/4 17:42:09	1	1	Physical Education	1	3	3	5	3	4	3	4	5	5	5	4	5	5	4	5	4	4	4	3	3	3	4	3	5	5	4	5	3	4	4	4	5	4
852	2025/1/4 17:42:37	2	1	Physical Education	1	5	3	1	3	5	4	5	5	3	4	4	3	4	5	5	5	5	4	5	5	5	4	5	3	3	3	4	4	5	4	5	5	4
853	2025/1/4 17:42:55	1	2	Physical Education	1	5	4	1	4	3	5	4	4	1	3	5	4	5	5	4	4	4	4	4	4	5	5	4	5	4	5	5	4	4	5	4	3	4
